# Supplementary material for: Discovering potential cancer driver genes by an integrated network-based approach
Source: Royal Society of Chemistry journal article supplement (doi:10.1039/c6mb00274a), 2016-07-05
Supplement: c6mb00274a1.xlsx [file c6mb00274a1.xlsx]

## Sheet: candidate driver genes
	Top 200 ranked genes
	GBM:Glioblastoma multiforme					OV:Ovarian cancer			TN:Breast cancer
Our method					NBS_diffusion				PageRank				DriverNet
	GBM	OV	TN		GBM	OV	TN		GBM	OV	TN		GBM	OV	TN
1	PIK3CA	PAK1	PTEN		PIK3CA	PAK1	PIK3CA		TP53	TP53	TP53		TP53	TP53	TP53
2	TP53	RHOA	PIK3CA		PIK3R1	RHOA	PTEN		EGFR	KRAS	PIK3CA		EGFR	KRAS	PIK3CA
3	PIK3R1	AKT2	EGFR		TP53	IFNG	EGFR		PIK3CA	PTEN	NRAS		MTAP	UGT2B28	NRAS
4	RB1	ATM	RB1		RB1	AKT2	RB1		PTEN	RB1	RB1		PTEN	BCAT1	RB1
5	CDK4	PLCB2	NRAS		CDK4	ATM	NRAS		CDKN2A	ITPR2	PTEN		PIK3R1	LCT	EGFR
6	PTEN	CCNE1	TP53		AKT3	BCL2	PRKX		PIK3R1	CREBBP	EGFR		CDKN2A	RB1	PTEN
7	ERBB2	PTEN	TRAF6		PTEN	ADCY1	NR3C1		CDKN2B	PLCB1	NR3C1		CYP27B1	PTEN	PRPS2
8	EGFR	CREBBP	PRKX		ERBB2	PLCB2	TRAF6		MTAP	UGT2B28	PRKX		PIK3CA	PLCB1	NR3C1
9	PDGFRA	PRKDC	NR3C1		EP300	MITF	PPP3CA		RB1	BCAT1	TRAF6		PDGFRA	ALG8	YES1
10	AKT3	MYC	CASP3		PDGFRA	CCNE1	MMP2		CDK4	AKT2	ADCY9		IDH1	DGKB	CREBBP
11	EP300	RB1	PPP3CA		DDIT3	PTEN	YES1		CYP27B1	PLCB2	PPP3CA		SEC61G	PLCD4	PGM2
12	MAPK9	PLCB1	MMP2		MAPK9	CREBBP	NFATC2		PDGFRA	EP300	MAP3K1		POLR2B	PTK2	MAN2A2
13	DDIT3	KRAS	LRP6		MDM2	PRKDC	PRKCE		IDH1	NF1	CASP3		CDK4	AKT2	ADCY9
14	KIT	EP300	NFATC2		PRKDC	MYC	RHEB		ERBB2	RHOA	CREBBP		PRKCG	TTN	JAK1
15	PRKDC	PRKCG	PRKCE		EGFR	RB1	CASP3		MAPK9	PLCZ1	YES1		PIK3C2G	SI	LCLAT1
16	KRAS	NF1	ADCY9		PIK3CG	PLCB1	PLCB3		AKT3	LAMA3	PLCB3		PPP2R5D	PAK1	CYP2A6
17	IFNB1	LAMA3	YES1		KRAS	KRAS	ADCY1		EP300	IFNG	HSPA8		NOS3	RHOA	HEXA
18	CTDSP2	ITPR2	PLCB3		CTDSP2	EP300	MAP3K1		SEC61G	PRKCG	PRKG1		RB1	AOX1	POLR1A
19	PIK3CG	IFNG	NCOA1		RET	MET	FOXP3		NF1	PIK3C2G	PRPS2		IFNA2	GSTT1	HMGCS2
20	MDM2	CTNNB1	FOXP3		KIT	CTNNB1	ADCY9		IFNB1	MYC	LRP6		ITGB3	XYLT1	IDH3B
21	CDKN2A	BCL2	MAP3K1		NF1	CACNA1C	LRP6		ITPR3	PAK1	FLNB		CCT6A	PRKCG	PRKCZ
22	RET	MITF	PLEKHA2		PTCH1	PRKCG	PLEKHA2		MDM2	PRKDC	PRKCE		NUP107	TUSC3	OR4N4
23	NF1	PLCZ1	RHEB		IFNB1	NF1	NCOA1		KIT	CCNE1	PGM2		ERBB2	F2	CCND1
24	PTCH1	CACNA1C	ADCY1		CDKN2A	APC	TP53		PIK3C2G	LCT	NFATC2		PAPSS1	PPT1	UGT2B17
25	MET	ADCY1	JAK1		ITPR3	LAMA3	JAK1		PIK3CG	ADCY1	MMP2		AHCYL1	CYP2C19	PSPH
26	CDKN2B	CACNA1D	CREBBP		NFATC1	CACNA1D	WAS		KRAS	BCL2	LCLAT1		MAPK9	POLD2	PPP3CA
27	NFATC1	PIK3C2G	TBC1D4		MET	ITPR2	PIK3R1		CTDSP2	ATM	CYP2A6		ITPR3	ITPR2	PAPSS2
28	CDKN1B	AP2A1	ERBB3		CDK6	PTK2	IQSEC2		PSPH	PTK2	ADCY1		NF1	CAD	RHEB
29	ITPR3	MACF1	CACNA1F		CDKN1B	MACF1	ADCY2		IFNA1	ST8SIA1	PRKCQ		MDM2	MGAT5B	DGKI
30	AKT1	KIT	FGFR2		CHEK2	KIT	PRKCQ		PRKDC	KIT	FOXP3		PIK3C2B	ACAT1	ADI1
31	PPP2R5D	APC	FLNB		CDKN2B	AP2A1	FLNB		POLR2H	SI	WAS		KLHL9	DHFR	ENO2
32	AP2M1	PTK2	TFE3		AKT1	PIK3CA	RUNX2		IFNA2	AP2A1	JAK1		RPL10	CYP8B1	ATM
33	CHEK2	MET	MAP3K12		PPP2R5D	PAK3	MAP3K12		IFNA8	CACNA1C	PIK3R1		AKT3	KIT	PIK3R1
34	FH	STAT5B	CSF2RA		MAPK14	STAT5B	HSPA8		POLR2B	PIK3CA	MAN2A2		ACTN4	ACACB	ERBB4
35	ITGB3	PAK3	WAS		FGFR3	BRAF	RBBP7		IFNA5	CTNNB1	RHEB		POLR2H	POLD3	PLCE1
36	PDGFRB	AR	RUNX2		ITGB3	PXN	CACNA1F		IFNA14	CACNA1D	IQSEC2		EP300	GALNT13	PRKX
37	PIK3C2B	BRAF	IQSEC2		DUSP16	LAMA2	TBC1D4		IFNA6	APC	PAPSS2		PIGA	NRAS	CS
38	MAPK14	BCAT1	ADCY2		FH	OMG	CREBBP		FH	CMAS	ERBB3		SNRPE	MTHFD2L	LCT
39	VAV2	PXN	PRKCQ		CDKN1A	AR	LAMA4		IFNA17	PLCD4	POLR1A		PANK1	LAMA3	PARK2
40	CYP27B1	LAMA2	FIGF		MAPK13	GLI2	FURIN		DDIT3	STAT5B	FURIN		KRAS	ST3GAL3	NOTCH2
41	PIK3C2G	GLI2	FOXO4		AP2M1	MYH4	FIGF		IFNA7	PXN	CACNA1F		DTX3	UXS1	TPH2
42	DUSP16	OMG	RBBP7		SMAD4	NRAS	ELK1		IFNA16	PAK3	UGT2B17		RAP1B	GRIN2A	MMP2
43	FGFR3	MYH4	LAMA4		TBC1D4	ETV1	FGFR2		IFNA10	LAMA2	CDH1		CLOCK	ADCY8	DCT
44	KDR	GAB2	PIK3R1		PDGFRB	SOS1	FLT3		PPP2R5D	MITF	TNFRSF1A		DCTN2	ATP6AP1	HMGCS1
45	NOS3	UGT2B28	PAK1		NFKB1	GAB2	CSF2RA		PIK3C2B	ADRBK2	NCOA1		WNT2	ST6GALNAC3	MAP3K1
46	POLR2H	PPP1R3A	FLT3		CCND3	EXOC4	TFE3		MET	CALM3	SIAH1		RET	ITGA4	ARHGAP6
47	FGFR2	MAP3K1	MAP3K7		FGFR2	PPP1R3A	PPARGC1A		NDUFB5	ETNK1	CSF2RA		COL9A3	RPN1	CBL
48	CDK6	PIK3CA	CD4		FLT1	ADCY9	SKP2		RET	PIK3R1	FIGF		ATP6AP1	CREBBP	GRIA2
49	MEF2D	ADCY9	ERC1		KDR	GNA14	FOXO4		IFNA21	ACACB	LIPF		GRPR	POLE	DPYD
50	MAPK13	TBC1D4	FGF6		EIF4G1	TBC1D4	CDH1		MAPK14	MYH4	FGFR2		OS9	G6PD	HSPA8
51	SMAD4	WNT6	SIAH1		VAV2	SIN3B	CD40LG		CDKN1B	AR	CD4		AVPR2	ADCY2	RRM1
52	EIF4G1	MAP3K5	HSPA8		PIM1	CACNA1A	SIAH1		EHHADH	NFKB1	GRIA2		AKT1	ALPL	BMPR1B
53	ROCK2	EXOC4	PRKG1		NOS3	CAMK2B	XIAP		VAV2	F2	PIGA		IRS1	AMPD2	PLA2G2E
54	FRAP1	PPP2R1A	XIAP		PIK3C2B	FGF23	FOXO3		B4GALNT1	MACF1	EBP		KPNA2	NDUFV3	SIAH1
55	INPP5A	PLCD4	FURIN		EXOC1	SPTAN1	FES		PTCH1	BRCA1	HMGCS1		GRB7	NF1	LAMA4
56	CDKN1A	CACNA1A	CCND1		FGFR1	VAV2	ARAF		PIGA	CLTCL1	ADCY2		PRKDC	WNT2B	TAF1
57	EXOC1	NRAS	FOXO3		RBBP7	ATF1	MAP3K7		NOS3	SOS1	IL2RG		PSPH	PXN	IQSEC2
58	FLT1	IL8	PCDH15		THBS1	IL8	LAMA1		NFATC1	MAPK8	CD40LG		RHOB	ASNS	NDUFS4
59	NDUFB5	SOS1	CDKN1B		TEK	MAP3K1	ERC1		ITGB3	BRAF	NFKBIA		MARS	HRH4	TDO2
60	USF1	GNA14	SKP2		DKK2	CTNNA3	PAK1		MCCC1	MAPK1	RBBP7		A2M	FLAD1	P2RY4
61	PSPH	MAP2K4	RNF111		ROCK2	NFKB1	ERBB3		ATP6AP1	MET	DGKI		SGCB	BDKRB1	HIST1H2BH
62	IDH1	ADCY8	PRPS2		MEF2D	ADCY8	ERBB4		PRKCG	DHFR	PLEKHA2		CLN5	ADCY1	SEC61G
63	NFKB1	NFKB1	FADD		TGFBR2	TCF7L2	IL3RA		NUP107	ADCY8	PARK2		CENPC1	PIK3CA	NCBP2
64	TEK	ETV1	CITED1		FN1	WNT4	IL2RG		DGKG	DGKB	LAMA4		LAMP1	GSS	ITCH
65	TNFRSF10A	MAPK8	FGF23		FGFR4	WNT6	GRIA2		AOC3	MAP3K1	RUNX2		CCT2	PPP2R1A	HRH1
66	FN1	PIK3R1	IL3RA		FRAP1	PPP2R1A	FGF6		B3GNT5	NDUFC2	PKM2		PRKX	ST8SIA1	RBM5
67	TBC1D4	CAMK4	CD40LG		ATM	MAP3K10	PLCG2		LDHA	ITGA4	PDHA1		PPP3CA	CACNA1C	GH1
68	FGFR1	CAMK2B	HMGCS1		FURIN	MAP3K5	DAPK1		MAPK13	ATP6AP1	FOXO3		ARHGAP9	PKLR	SFRS7
69	TGFBR2	CDH2	CDH1		PPP3CA	ELK1	PRKCZ		PDGFRB	IL8	TDO2		BAX	PAH	RASGRF1
70	FURIN	MAPK1	CELSR1		TNFRSF10A	MAP2K4	CD4		KMO	GRIN2A	FOXO4		MEF2D	HAO2	RANBP2
71	POLR2B	MAP3K10	ELK1		UBE2D3	MYH1	PRKG1		EIF4G1	POLD2	HEXA		HSP90AA1	BRCA1	PGM1
72	PIM1	F2	CYSLTR2		POLR2H	CDH2	NOS1		INPP5A	CAMK2B	DAPK1		GRLF1	GSN	PDGFRA
73	CCND3	ATF1	HTR2A		RALA	ITK	BID		RAP1B	PPP2CA	FLT3		GNRHR	OR2M2	NUP43
74	FGFR4	LAMA1	ARAF		USF1	WNT11	FADD		KDR	MAP3K5	HIST1H2BH		IRAK1	AASS	PNLIPRP3
75	THBS1	PPP2CA	PPARGC1A		PIK3C2G	LAMB1	TNFRSF1A		AP2M1	ITGAV	ITGA2		HSPA8	CPS1	GK
76	GDI1	WNT4	DAPK1		RAP1B	FZD5	VEGFC		ST6GAL1	PPP2R1A	TFE3		EPHA5	CLTCL1	NCR2
77	RAP1B	FZD5	PRKCZ		GAS2	CYCS	CCND1		ALG3	NRAS	ERBB4		FGD2	MYH3	RBMX
78	PRKCG	EGR1	APH1B		CYLD	EGR1	CYTH3		CHEK2	CACNA1A	ELK1		CSF1R	GABRA6	FURIN
79	CACNA1C	ITGAV	CYTH3		GDI1	TGFBR2	SLC25A6		TNFRSF10A	GLI2	MAP3K7		KCNMB3	ADRBK2	HDAC6
80	ATM	CLTCL1	DKK1		CACNA1C	PLCZ1	ATM		PAPSS1	ALG8	CELSR1		SFRS3	PDGFC	AGTR1
81	IFNA5	CTNNA3	PLEKHA1		GRB7	CAMK4	ITCH		SMAD4	MAP3K7	OR4N4		CNOT2	PRPS1L1	MET
82	IFNA14	CHRM2	NOS1		SOCS1	IKBKB	FAS		AKT1	TTN	OR4M2		FLT3	NDUFB7	MYO9A
83	SOCS1	MYH1	RASGRP2		FRS2	LAMA1	CTNNA1		FGFR2	WNT6	ASMT		LAPTM4A	TAF4B	CHRM3
84	IFNA7	SIN3B	PLCG2		SDC1	PPP2CA	CDKN1B		ROCK2	MAP2K4	HRH1		MAPK8IP3	NFKB1	CDH1
85	IFNA16	FGF23	LAMA1		CACNA1B	CBLC	CYSLTR2		ATP6V1C2	GAB2	ERC1		MAPK14	ADCY9	TJP1
86	IFNA10	PLCB4	FES		FLT3	PIK3R1	CITED1		TEK	CHRM2	HMGCS2		GNAI1	CCAR1	TNFRSF1A
87	RBBP7	INSR	PTPN6		CBL	BIRC3	DAB2		IFNW1	YES1	PTPN12		CTDSP2	P2RY2	FAF1
88	IFNA17	MAP3K7	GAB2		GNAI2	F2	FHIT		CDKN1A	LAMA1	XIAP		ATP1B4	HLA-G	ITGA2
89	DKK2	YES1	SLC25A6		NR4A1	LAMC1	SLC2A1		SAT1	OR2M2	PLCG2		THBS1	SOS1	ALDH1A1
90	CYLD	TCF7L2	TNFRSF1A		PRKCG	ADCY5	RNF111		MEF2D	CYP2C19	IL3RA		CHEK2	ACTN2	GNB3
91	SPR	ACACB	ITGA2		FIGF	BRCA1	APH1B		CCT6A	ADCY9	PRKCZ		INSR	GK2	LIPC
92	PPP3CA	ADCY5	PPP2CB		MAP3K6	CLTCL1	PLEKHA1		SPR	MTHFD2L	LAMA1		CDKN2B	OR12D3	PTGFR
93	MAP3K6	CYCS	FGFR3		KPNA2	MAP3K7	CTBP1		PPP3CA	CYP11B1	MAP3K12		PIGX	CACNA1D	LAMA1
94	FRS2	SPTAN1	ERBB4		WNT2	YES1	RASGRP2		GNB1	OMG	ARHGDIB		LEF1	PRODH2	CFL1
95	BAX	WNT11	MYC		BRCA2	ITGAV	MMP9		BAX	PPP1R3A	PPARGC1A		VAV2	SHMT1	CALM3
96	EHHADH	LCT	GRIA2		RNF128	MYH2	CELSR1		PIK3CD	CBLC	ITCH		AMD1	PRKDC	TTN
97	IFNA1	IRS1	GUCY1A2		CSF1R	PIK3C2G	PCDH15		TGFBR2	LDHB	TBC1D4		AP1S2	ITPKB	ADRB3
98	IFNA6	ITK	WNT5B		RPS6KA3	MYH3	ARHGDIB		GDI1	CPS1	PCDHA8		CACNA1C	MC2R	NFKBIA
99	RALA	NDUFC2	PLA2G2C		IFNA17	MAPK8	CTNNA2		EXOC1	CAMK2D	MSN		KNG1	NNT	CLCA1
100	SDC1	TGFBR2	CDH10		IFNA7	MAPK1	MSN		CCND3	POLD3	CTPS2		GRM1	CYP11B1	PRKG1
101	GAS2	LAMC1	FAS		IFNA16	ITGB2	NF1		CDK6	VAV2	BRCA2		EBP	PRLR	GRM1
102	IFNA21	VAV2	CCND2		IFNA10	WNT2B	TRAF3		WNT2	OR12D3	APH1B		EIF3F	ATP5O	CD40LG
103	CASP9	LAMB1	SLC2A1		IFNA5	ARHGEF1	ADAM10		FRAP1	MGAM	CBL		ADORA1	MYC	RBBP4
104	CACNA1B	CBLC	ATM		IFNA14	MDM2	LAMA2		GK	AOX1	VEGFC		TEK	ACOX1	TAF5
105	UBE2D3	ARHGEF1	FHIT		TRAF6	PIK3CG	RAB11A		ACSL4	EXOC4	KRAS		KCNMB4	RYR2	YBX1
106	RRM2	ITGA4	ITCH		COL1A1	COL4A4	AP2B1		CACNA1C	UGT2B10	GK		PRSS1	TPO	ALG10
107	MSH6	COL4A4	FZD3		MSH6	TNF	RASGRF1		RRM2	EHHADH	ENO2		TUBGCP2	TKT	NDUFS2
108	FLT3	CDH1	CTBP1		BCL6	GRB2	FGF23		POLA1	CDH2	IDO2		GLP1R	MAP3K10	HUWE1
109	MCCC1	ATP6AP1	APP		BAX	CCND1	GAB2		PIK3C2A	MYH1	IDO1		MAN1A1	ADH1B	MBTPS1
110	CBL	ELK1	FBXW11		FLNA	PRKCI	ARHGEF6		ATM	GNA14	MBTPS1		GNAI2	GLS	PAK1
111	IFNA2	ITGA6	PPP3CC		NDUFB5	DNAH3	PAK6		NFKB1	RYR2	NOS1		EXO1	BDKRB2	C1S
112	IFNA8	CCND1	DUSP16		SPRY2	LAMB4	PHKA2		KLHL9	HLA-G	HEXB		BMPR1A	GK	LRPPRC
113	COL1A1	CDC25B	ADAM10		ITGB2	PKN1	PPP2CB		DUSP16	ITGA6	RRM2		STAT1	PTDSS1	DNAH5
114	FLNA	SI	HSD17B10		CCND2	RELA	PPP3CC		FLNA	MYH3	FHIT		IFNG	CNGA3	ATP1B4
115	NR4A1	MEF2A	CACNA1C		IFNA6	INSR	CXCR3		FURIN	POLR2B	MYO9A		CDKN1A	ATIC	PRKCQ
116	ITGB2	RYR2	PTK2B		IFNG	NTRK1	MAP3K7IP2		FN1	SPTAN1	HPRT1		FIGF	AGTR2	MXD1
117	WNT2	IKBKB	PHKA2		IFNA1	IRS1	ITGA2		CBL	MAP3K10	AP2B1		FAS	PGLS	PCDHA8
118	MAPK7	FZD7	CXCR3		IFNA21	MLH1	DKK1		FRS2	CDH1	HSD17B10		PTCH1	COX5B	CASP3
119	RNF128	BRCA2	PGM2		IFNA2	NFATC2	SH3KBP1		FLT1	CYP2C18	ACACA		XRCC6	MYH4	ARHGAP5
120	KPNA2	DNAH3	CDC20		IFNA8	BRCA2	TBL1X		ITGB2	PLCB4	PDGFRA		TPK1	GRB2	PIK3CB
121	BRCA2	NLK	VEGFC		COL1A2	ITGA4	ERBB2		GNRHR	XYLT1	NF1		IL29	IFNG	GZMA
122	EPHB2	BRCA1	FGF3		PRKCA	PRKCQ	CDC20		PRKX	TBC1D4	AMACR		TMLHE	ETV1	IL2RG
123	GRB7	ITGB2	FGF19		FOXO3	WNT9B	PIK3CB		TBC1D4	ARHGEF1	CXCR3		FGFR3	CCNE1	SOS1
124	TSC1	DHFR	FGF4		TSC1	COL1A2	WNT5B		MAOA	PIGN	RASGRP2		TRAF6	MMP1	ERBB3
125	CCND2	CAMK2D	ITPR1		BAMBI	CDC25B	DUSP16		PIM1	INSR	NCR2		ACTL6A	BLK	IL3RA
126	MYST4	BIRC3	GRAP		FAS	FZD7	ITPR1		HSP90AA1	CAMK4	TAF1		GUCA1A	OCRL	APH1B
127	BCL6	ST8SIA1	CSNK1G1		GNAI1	MEF2A	CBL		CYSLTR2	EGR1	NOTCH2		POU2F1	RDH8	KRAS
128	IFNG	ADCY2	IL2RG		BMPR1A	ADCY2	WNT16		IDH3G	GRB2	CTPS		SSR4	LAMA1	RFC5
129	CD22	MAP3K4	CTNNA1		EPHB2	LMNA	FAT1		IRAK1	ADCY2	CCND1		FURIN	ITGAV	MAGOHB
130	FIGF	LAMB4	GNB3		LEF1	PTPRK	NFKBIA		BRCA2	MYH2	IDH3B		NFKBIB	VAV2	RXRA
131	COL1A2	MYH3	CBL		HSP90AA1	MMP2	FGFR3		ADSSL1	IRS1	NUP43		C1QA	GLDC	LAMB3
132	GNB1	ADRBK2	PIK3CB		IRS1	DMD	HTR2A		ODC1	IKBKB	TMSB4X		SLC2A2	RPN2	KALRN
133	HSP90AA1	MYH2	TBL1X		MYST4	ITGA6	GUCY1A2		ME3	GRIN2B	PIK3CB		PLA2G6	EPHX2	WHSC2
134	FOXO3	PLD2	FAT1		CYP27B1	CDH1	CACNA1C		PCYT1B	ETV1	GRID2		EDNRB	OR5V1	GAB2
135	BMPR1A	PTPRK	ERBB2		PRKX	FAS	FBXW11		FGFR1	UGT1A8	NCBP2		MET	MET	PKM2
136	NTRK1	WNT9B	COL1A2		CASP9	NTRK2	MAGED1		RPL10	CDC25B	NDUFA10		PIK3CG	SUPT5H	HIST1H4A
137	MTAP	TNF	HDAC8		PSMD13	MAP3K4	CD19		EIF2B5	TGFBR2	FAF1		CEP135	OR2C3	DAB2
138	BAMBI	COL3A1	LAMA2		PHKG1	CTBP1	PTPN6		CASP9	PPT1	SLC25A6		BCOR	LAMA2	CASC5
139	LDHA	MMP2	PAK6		MAPK7	ITGA3	E2F3		MAOB	PLD2	ARAF		MLH1	CHRM2	MED12
140	PIK3CD	NR3C1	DAB2		OMG	COL3A1	TERT		RBBP7	TUSC3	CYSLTR2		FAF1	ITGA6	LRP2
141	RPS6KA3	PAK4	PORCN		NTRK1	RAP1B	CDH10		SOCS1	MAPK3	DAB2		MYST4	DHRS4	OR4M1
142	CSF1R	ITGB6	ADRA1A		PIK3CD	NOD2	PIK3CG		DKK2	F2R	OCRL		CACNA1B	TUBB4	DSP
143	TRAF6	F2R	WNT16		EHHADH	CHRM2	PLA2G2C		ACTN4	HSP90AA1	P2RY4		SNRPD2	EP300	MYH2
144	DVL1	PIK3CG	ARHGDIB		COL11A1	SHC1	CSNK1G1		NFKBIB	LAMB1	GAB2		LYZ	LHCGR	CEP192
145	PRKCA	STAT1	NTF3		CD22	JAK2	FGF3		RPS6KA3	TNF	GNB3		POLA1	NUP205	STAG2
146	SPRY2	PRKCI	TNFRSF10B		AIFM1	STAT1	FGF19		THBS1	BIRC3	RBBP4		UBE2J2	OR51A4	ANAPC4
147	FAS	MLH1	TNFRSF10A		MDM4	CHP	FGF4		SPHK2	PAK4	GAPDH		CTNNA3	OR5D16	RHOG
148	DGKG	EGLN2	FGFR1		PAK3	MYLK	SLC25A4		HADH	HAO1	NDUFA9		PSMD13	PLCB2	SFRS6
149	MYLK2	GSK3A	TNFRSF10D		PSMD2	CLTC	HDAC8		TKTL1	TRIT1	FAS		GRSF1	HAAO	MTNR1A
150	GNAI2	PPARGC1A	PPP2R2A		FZD4	TRAF6	AIFM1		EIF4A2	HRH4	GRIN2A		PHKB	NDUFS1	RDH10
151	FZD4	DGKA	CTNNA2		GNB1	NRG1	PLA2G2E		FGFR3	MAPK14	GOT2		CDH17	OR10T2	NAGPA
152	NDUFA4L2	NFATC2	LCLAT1		DVL3	TRAF2	PCDHA8		FLT3	ADCY5	PAK1		KISS1	STAT5B	TMSB4X
153	ATP6V1C2	NFATC1	OCRL		KNG1	NLK	CASP8		FGFR4	PIK3CG	LIPC		TBK1	MGAM	VPS37C
154	ST6GAL1	PKN1	PAPSS2		EDNRB	NFATC1	FGF10		ETNK2	TPO	DNAH5		P2RY10	DMD	CCT6A
155	ALG3	DMD	LIPF		INPP5A	ACTN2	RPS6KA3		CYLD	ACAT1	SKP2		MID1	IKBKB	UBR5
156	PAK3	INPPL1	PCDHA6		COL9A3	MAP3K8	KRAS		USF1	STAT1	ATM		CEP290	LRP1B	SMAP1
157	PHKG1	GNB2	RAB11A		PSPH	EGLN2	VAV3		AHCYL1	BRCA2	CYTH3		CCK	ITGA3	PPIH
158	B4GALNT1	WNT2B	RASGRF1		MSH2	PPP3CC	MYC		HSPA8	NR3C1	CTBP1		PMF1	DGKA	P2RY14
159	B3GNT5	RELA	BID		RFC4	ARHGEF7	KLHL13		GRB7	NUP205	NDUFS4		CCT3	HSD17B4	UGT1A8
160	AOC3	MDM2	CASP8		CASK	DKK2	PDGFRA		GNAI1	DNAH3	PCDH15		NDUFA4L2	F2R	AIRE
161	IRS1	CMAS	FGF10		GLI1	ITGB6	BMPR1A		MAN1A1	FZD5	RNF111		PLAA	NT5C3	BMPR1A
162	EDNRB	NCOR1	ARR3		COL4A6	ERBB3	MET		CTPS2	DMD	CDKN1B		LAMP3	PRKX	EDNRA
163	PSMD13	HDAC2	MSN		PIP4K2C	PRKX	ADRB3		MYST4	ELK1	CS		NTSR1	HNRNPA1	F9
164	MSH2	DKK2	RPS6KA3		DVL1	PAK2	HSD17B10		IRS1	SIN3B	FES		EPHA7	GRIN2B	ABCA6
165	GNAI1	NTRK1	SLC25A4		POLR2B	SLIT2	FGF13		RNF128	ATF1	PSPH		HADH	SNRPB	SPCS3
166	PRKX	PRKCQ	PYGO1		MYLK2	PAK4	HMGCS1		SDC1	ENPP1	ADI1		ABL1	QARS	BRCA2
167	AVPR2	IGF1R	MAGED1		AVPR2	RYR2	BRCA2		AVPR2	CYCS	HAAO		NOX4	COL5A3	GTF2E2
168	KNG1	FN1	E2F3		MCCC1	CAMK2D	LAMB3		SNRPE	COL4A4	MAS1		MAPK12	CYP2E1	CLOCK
169	MAN1A1	GRB2	NFKBIA		MAP3K13	GNB2	ADRA1A		NDUFA4L2	JAK2	RASGRF1		SOCS1	SPRY2	MED4
170	COL3A1	MSN	BRCA2		SEC61G	IQGAP2	PARK2		EPHB2	NT5C1A	DCT		COMT	MAPK1	PTPN6
171	SEC61G	THBS1	CACNA2D4		ADCY6	FKBP8	COL1A2		TPH2	NFATC1	SUCLA2		PPYR1	EIF2S1	NR2E3
172	AIFM1	GRIN2A	PCDHA8		PIK3C2A	NR3C1	BDNF		BMPR1A	WNT4	CTNNA1		ATP6V1C2	CTNNB1	XPO1
173	SPHK2	SLIT2	ADRB3		HSPA8	CDKN2A	TMSB4X		GRLF1	WNT11	FGFR3		HDAC10	CHRM5	COL4A6
174	PSMD2	COL6A3	AP2B1		CBLC	GSN	PTPN12		PRKCA	OR5V1	ST8SIA5		MAPK13	PSMC3	NT5C1A
175	LEF1	JAK2	NF1		RASSF1	DGKA	GNB3		FIGF	GALNT13	GMPPA		APITD1	CNTNAP2	NCOA1
176	COL9A3	FAS	TRAF3		COL3A1	F2R	ARR3		GAS2	CNGA3	RBMX		DLL3	GRIK2	PIGG
177	ADSSL1	USO1	AIFM1		CACNB3	TGFBR3	BRAF		MAP3K6	CLTC	TPH2		PAPSS2	OR8U1	STAT3
178	AP2A1	LMNA	LAMC2		AP2A1	BLK	SMARCA4		PSMD13	HDAC2	FAT1		DDO	PTGFR	ARHGDIB
179	FGF21	CSNK2A1	TERT		KALRN	RAC3	MXD1		UBE2D3	PRKACG	RANBP2		CCND3	HSP90AA1	P4HA2
180	PIK3C2A	FGFR3	SH3KBP1		CYSLTR2	GSK3A	GPC3		IFNG	CHRM5	FBXW11		IGBP1	AP2A1	ELK1
181	AHCYL1	EHHADH	TIAM1		NDUFA4L2	TIAM1	FLT1		EPHA5	OR2C3	ITPR1		IFNB1	TRAF5	CTSG
182	IFNW1	PRKX	CD19		GNB4	MSN	BTK		MSH6	ACSL1	CITED1		NPPA	ITGB2	EIF2AK4
183	CACNB3	DGKB	PARD3		MYCN	ADRBK2	CACNA1B		CENPC1	FGF23	CD99		SDCCAG8	GABBR2	PLD1
184	ZBTB17	MAPK14	ARHGEF6		PAK2	MADD	NSUN2		PIGX	CTNNA3	TYMS		PMS2	P2RX1	AP1S2
185	MDM4	CCDC6	SAP30		RHOB	LAMC3	MACF1		EDNRB	DHCR7	SFRS7		HGF	BRCA2	SULT1A2
186	GRLF1	ALG8	MAP3K7IP2		PPP1R15A	RNF111	BCL2A1		RHOB	PTPRK	FADD		UBE2D3	NOS1	MASP1
187	CBLC	ETNK1	CACNA1B		IFNW1	CDH17	GRID2		G6PD	PRKX	TPI1		PTPRB	PLD2	EPHA2
188	HSPA8	TPO	RARB		GRLF1	DOCK1	LRPPRC		LIPF	FZD7	ARHGAP6		REN	GRLF1	NF1
189	COL4A6	MYLK	HPRT1		CSF3R	HSP90AA1	PTK2B		CSF1R	ITK	PTPN6		RYR3	DGKI	FXYD2
190	PPP1R15A	THBS2	EIF4EBP1		SPHK2	MYST4	DAPK2		NDUFA4	CCND1	GUCY1A2		ATF5	OR11H6	ETV6
191	ADCY6	PDGFC	BAG4		DSP	CCDC6	IQGAP1		LEF1	TAF4B	CACNA1C		PRKCA	DRD1	MTFMT
192	PIP4K2C	TRAF6	EGR3		WNT1	PTPRC	SAP30		CD22	GSK3A	ANAPC4		DIS3	UAP1	OGDH
193	WNT1	COL1A2	NRG1		GNAS	COL6A3	CCND2		POLR2I	LAMC1	DUSP16		PLOD1	AOC3	PVRL1
194	GRM5	ERBB3	TNFRSF10C		FGF21	PPARGC1A	TAOK2		PIGN	ITGB2	HTR2A		MANBA	MTMR1	TARSL2
195	PAPSS1	CLTC	SDC1		GRM5	RPS6KA1	ITPR2		NDST3	ACTN2	PHKA2		PDSS2	CDKN1B	TLR7
196	KMO	PDGFRA	VAV3		PML	MMP7	CCNB3		SGMS2	CCAR1	PLCE1			C7	MPL
197	MLH1	NRG1	PARP14		MLH1	NCOR1	HIF1A		CYP2U1	TCF7L2	RAB11A			GAD1	RUNX2
198	CASK	PLCB3	GPC3		DNAL4	IGF1R	TLR7		RFC4	HEXA	ITPR2			CAT	SLIT2
199	WNT16	HSP90AA1	NDUFC2		SHH	THBS2	RARB		ALDH1A3	ST3GAL3	SLC2A1			UQCRB	LPL
200	OMG	SHC4	ASMT		WNT16	APAF1	FZD3		BAMBI	GSS	ERBB2			DPM1	NSUN2
