# Supplementary material for: Discovering potential cancer driver genes by an integrated network-based approach
Source: Royal Society of Chemistry journal article supplement (doi:10.1039/c6mb00274a), 2016-07-05
Supplement: c6mb00274a2.xlsx [file c6mb00274a2.xlsx]

## Sheet: GBM
Category	Term	Count	%	Benjamini		Category	Term	Count	%	Benjamini		Category	Term	Count	%	Benjamini		Category	Term	Count	%	Benjamini
GOTERM_BP_FAT	GO:0016310~phosphorylation	57	28.7879	2.65907e-21		GOTERM_CC_FAT	GO:0005829~cytosol	51	25.7576	3.2565e-09		GOTERM_MF_FAT	GO:0004672~protein kinase activity	47	23.7374	1.36202e-18		KEGG_PATHWAY	hsa05200:Pathways in cancer	61	30.8081	7.05023e-27
	GO:0006793~phosphorus metabolic process	60	30.303	8.46835e-20			GO:0005942~phosphoinositide 3-kinase complex	7	3.53535	7.33471e-07			GO:0004714~transmembrane receptor protein tyrosine kinase activity	19	9.59596	3.55308e-16			hsa05212:Pancreatic cancer	22	11.1111	6.48925e-13
	GO:0006796~phosphate metabolic process	60	30.303	8.46835e-20			GO:0045121~membrane raft	13	6.56566	5.43969e-05			GO:0001882~nucleoside binding	67	33.8384	6.91669e-14			hsa05215:Prostate cancer	24	12.1212	9.166e-13
	GO:0042325~regulation of phosphorylation	43	21.7172	1.29785e-19			GO:0000267~cell fraction	36	18.1818	8.07412e-05			GO:0001883~purine nucleoside binding	66	33.3333	1.16684e-13			hsa04510:Focal adhesion	34	17.1717	9.41469e-13
	GO:0006468~protein amino acid phosphorylation	50	25.2525	1.30212e-19			GO:0000307~cyclin-dependent protein kinase holoenzyme complex	5	2.52525	0.000591218			GO:0030554~adenyl nucleotide binding	65	32.8283	1.97065e-13			hsa05210:Colorectal cancer	23	11.6162	1.06015e-12
	GO:0019220~regulation of phosphate metabolic process	43	21.7172	3.62227e-19			GO:0044421~extracellular region part	31	15.6566	0.000697206			GO:0005524~ATP binding	62	31.3131	4.40759e-13			hsa05214:Glioma	20	10.101	2.72649e-12
	GO:0051174~regulation of phosphorus metabolic process	43	21.7172	3.62227e-19			GO:0005615~extracellular space	25	12.6263	0.000778887			GO:0032559~adenyl ribonucleotide binding	62	31.3131	6.96221e-13			hsa05218:Melanoma	21	10.6061	2.99616e-12
	GO:0007167~enzyme linked receptor protein signaling pathway	35	17.6768	5.14955e-17			GO:0005626~insoluble fraction	27	13.6364	0.00241977			GO:0017076~purine nucleotide binding	71	35.8586	7.77711e-13			hsa04010:MAPK signaling pathway	37	18.6869	1.39249e-11
	GO:0043549~regulation of kinase activity	35	17.6768	1.70836e-16			GO:0005624~membrane fraction	25	12.6263	0.00811473			GO:0032555~purine ribonucleotide binding	68	34.3434	3.47378e-12			hsa05223:Non-small cell lung cancer	18	9.09091	1.97562e-11
	GO:0043085~positive regulation of catalytic activity	41	20.7071	1.75262e-16			GO:0005654~nucleoplasm	26	13.1313	0.0107146			GO:0032553~ribonucleotide binding	68	34.3434	3.47378e-12			hsa04630:Jak-STAT signaling pathway	28	14.1414	2.53493e-11
	GO:0051338~regulation of transferase activity	35	17.6768	4.81221e-16			GO:0016023~cytoplasmic membrane-bounded vesicle	19	9.59596	0.0133126			GO:0000166~nucleotide binding	74	37.3737	5.06342e-11			hsa04620:Toll-like receptor signaling pathway	23	11.6162	2.63919e-11
	GO:0007242~intracellular signaling cascade	61	30.8081	9.36156e-16			GO:0031988~membrane-bounded vesicle	19	9.59596	0.0163825			GO:0004713~protein tyrosine kinase activity	20	10.101	1.18716e-10			hsa04650:Natural killer cell mediated cytotoxicity	26	13.1313	2.8038e-11
	GO:0044093~positive regulation of molecular function	42	21.2121	1.3157e-15			GO:0005901~caveola	6	3.0303	0.0164483			GO:0004674~protein serine/threonine kinase activity	26	13.1313	1.04483e-07			hsa05220:Chronic myeloid leukemia	20	10.101	4.75529e-11
	GO:0007169~transmembrane receptor protein tyrosine kinase signaling pathway	28	14.1414	1.46601e-15			GO:0044445~cytosolic part	9	4.54545	0.0229495			GO:0016303~1-phosphatidylinositol-3-kinase activity	7	3.53535	1.28833e-07			hsa04622:RIG-I-like receptor signaling pathway	19	9.59596	1.64225e-10
	GO:0045859~regulation of protein kinase activity	33	16.6667	2.43103e-15			GO:0005581~collagen	5	2.52525	0.0239631			GO:0001727~lipid kinase activity	9	4.54545	1.76273e-07			hsa04115:p53 signaling pathway	17	8.58586	7.2164e-09
	GO:0042127~regulation of cell proliferation	47	23.7374	7.83066e-15			GO:0031410~cytoplasmic vesicle	19	9.59596	0.0510865			GO:0035004~phosphoinositide 3-kinase activity	7	3.53535	2.20643e-07			hsa05213:Endometrial cancer	15	7.57576	1.18739e-08
	GO:0043067~regulation of programmed cell death	45	22.7273	7.80709e-13									GO:0019838~growth factor binding	13	6.56566	9.34494e-07			hsa05222:Small cell lung cancer	18	9.09091	2.25041e-08
	GO:0010941~regulation of cell death	45	22.7273	8.29559e-13									GO:0019899~enzyme binding	27	13.6364	9.36153e-07			hsa04370:VEGF signaling pathway	17	8.58586	2.81932e-08
	GO:0042981~regulation of apoptosis	44	22.2222	2.37277e-12									GO:0019900~kinase binding	16	8.08081	1.16576e-06			hsa04722:Neurotrophin signaling pathway	21	10.6061	4.98076e-08
	GO:0009719~response to endogenous stimulus	31	15.6566	9.72999e-12									GO:0005132~interferon-alpha/beta receptor binding	6	3.0303	1.7369e-06			hsa04140:Regulation of autophagy	12	6.06061	9.68781e-08
	GO:0010033~response to organic substance	40	20.202	3.12831e-11									GO:0004428~inositol or phosphatidylinositol kinase activity	8	4.0404	1.91755e-05			hsa04660:T cell receptor signaling pathway	19	9.59596	1.57197e-07
	GO:0007243~protein kinase cascade	29	14.6465	3.83068e-11									GO:0005021~vascular endothelial growth factor receptor activity	5	2.52525	6.20202e-05			hsa04012:ErbB signaling pathway	17	8.58586	2.20664e-07
	GO:0009725~response to hormone stimulus	28	14.1414	1.96082e-10									GO:0005125~cytokine activity	14	7.07071	0.000102706			hsa04210:Apoptosis	17	8.58586	2.20664e-07
	GO:0043065~positive regulation of apoptosis	30	15.1515	2.29517e-10									GO:0042802~identical protein binding	26	13.1313	0.000105903			hsa05219:Bladder cancer	12	6.06061	6.96775e-07
	GO:0043068~positive regulation of programmed cell death	30	15.1515	2.60904e-10									GO:0019901~protein kinase binding	12	6.06061	0.000173283			hsa04914:Progesterone-mediated oocyte maturation	16	8.08081	1.14642e-06
	GO:0010942~positive regulation of cell death	30	15.1515	2.80296e-10									GO:0048407~platelet-derived growth factor binding	5	2.52525	0.00023738			hsa04623:Cytosolic DNA-sensing pathway	13	6.56566	1.50005e-06
	GO:0008284~positive regulation of cell proliferation	29	14.6465	4.71579e-10									GO:0005007~fibroblast growth factor receptor activity	4	2.0202	0.000516961			hsa04060:Cytokine-cytokine receptor interaction	28	14.1414	1.52544e-06
	GO:0007166~cell surface receptor linked signal transduction	64	32.3232	5.84741e-10									GO:0005201~extracellular matrix structural constituent	8	4.0404	0.00408579			hsa05320:Autoimmune thyroid disease	12	6.06061	4.82814e-06
	GO:0051726~regulation of cell cycle	26	13.1313	6.17367e-10									GO:0004861~cyclin-dependent protein kinase inhibitor activity	4	2.0202	0.00544875			hsa04310:Wnt signaling pathway	20	10.101	4.89321e-06
	GO:0033674~positive regulation of kinase activity	22	11.1111	9.85013e-10															hsa04070:Phosphatidylinositol signaling system	14	7.07071	5.8201e-06
	GO:0051347~positive regulation of transferase activity	22	11.1111	1.96584e-09															hsa04916:Melanogenesis	16	8.08081	6.06704e-06
	GO:0048545~response to steroid hormone stimulus	20	10.101	2.10463e-09															hsa05221:Acute myeloid leukemia	12	6.06061	1.68125e-05
	GO:0008285~negative regulation of cell proliferation	26	13.1313	3.52624e-09															hsa05211:Renal cell carcinoma	13	6.56566	1.78996e-05
	GO:0044092~negative regulation of molecular function	25	12.6263	3.88786e-09															hsa04110:Cell cycle	17	8.58586	2.39283e-05
	GO:0043086~negative regulation of catalytic activity	23	11.6162	3.91023e-09															hsa04810:Regulation of actin cytoskeleton	22	11.1111	6.31684e-05
	GO:0051329~interphase of mitotic cell cycle	15	7.57576	1.22642e-08															hsa04144:Endocytosis	20	10.101	7.25967e-05
	GO:0007049~cell cycle	37	18.6869	1.30704e-08															hsa04612:Antigen processing and presentation	13	6.56566	9.70624e-05
	GO:0051325~interphase	15	7.57576	1.71487e-08															hsa04662:B cell receptor signaling pathway	12	6.06061	0.000179799
	GO:0022402~cell cycle process	31	15.6566	2.10272e-08															hsa04670:Leukocyte transendothelial migration	15	7.57576	0.000187114
	GO:0045860~positive regulation of protein kinase activity	20	10.101	2.22282e-08															hsa04540:Gap junction	13	6.56566	0.000187378
	GO:0032268~regulation of cellular protein metabolic process	28	14.1414	3.65394e-08															hsa04664:Fc epsilon RI signaling pathway	12	6.06061	0.000240897
	GO:0043069~negative regulation of programmed cell death	24	12.1212	7.92598e-08															hsa04720:Long-term potentiation	11	5.55556	0.000350156
	GO:0060548~negative regulation of cell death	24	12.1212	8.19486e-08															hsa04930:Type II diabetes mellitus	9	4.54545	0.000595591
	GO:0051270~regulation of cell motion	18	9.09091	1.07064e-07															hsa04910:Insulin signaling pathway	15	7.57576	0.000733774
	GO:0007050~cell cycle arrest	14	7.07071	1.13127e-07															hsa04020:Calcium signaling pathway	17	8.58586	0.00116852
	GO:0009628~response to abiotic stimulus	24	12.1212	1.16378e-07															hsa04150:mTOR signaling pathway	9	4.54545	0.0011704
	GO:0050678~regulation of epithelial cell proliferation	12	6.06061	2.12515e-07															hsa04960:Aldosterone-regulated sodium reabsorption	8	4.0404	0.00135069
	GO:0009615~response to virus	14	7.07071	2.14555e-07															hsa00562:Inositol phosphate metabolism	9	4.54545	0.00142649
	GO:0006917~induction of apoptosis	22	11.1111	2.4142e-07															hsa04062:Chemokine signaling pathway	17	8.58586	0.0021397
	GO:0000082~G1/S transition of mitotic cell cycle	11	5.55556	2.46139e-07															hsa04912:GnRH signaling pathway	11	5.55556	0.00565469
	GO:0012502~induction of programmed cell death	22	11.1111	2.46471e-07															hsa05217:Basal cell carcinoma	8	4.0404	0.00739513
	GO:0043066~negative regulation of apoptosis	23	11.6162	2.60862e-07															hsa04666:Fc gamma R-mediated phagocytosis	10	5.05051	0.0147018
	GO:0040012~regulation of locomotion	17	8.58586	5.97731e-07															hsa04520:Adherens junction	8	4.0404	0.0428845
	GO:0009314~response to radiation	17	8.58586	1.0469e-06															hsa05216:Thyroid cancer	5	2.52525	0.0430509
	GO:0046854~phosphoinositide phosphorylation	7	3.53535	1.45832e-06
	GO:0012501~programmed cell death	29	14.6465	1.49582e-06
	GO:0010604~positive regulation of macromolecule metabolic process	35	17.6768	1.51053e-06
	GO:0030258~lipid modification	11	5.55556	1.71877e-06
	GO:0046834~lipid phosphorylation	7	3.53535	2.14417e-06
	GO:0000079~regulation of cyclin-dependent protein kinase activity	10	5.05051	2.29408e-06
	GO:0008629~induction of apoptosis by intracellular signals	10	5.05051	2.29408e-06
	GO:0051336~regulation of hydrolase activity	21	10.6061	2.45725e-06
	GO:0001952~regulation of cell-matrix adhesion	8	4.0404	2.73707e-06
	GO:0016477~cell migration	19	9.59596	2.73935e-06
	GO:0009416~response to light stimulus	14	7.07071	2.81175e-06
	GO:0030334~regulation of cell migration	15	7.57576	4.35881e-06
	GO:0009411~response to UV	10	5.05051	4.62283e-06
	GO:0051272~positive regulation of cell motion	12	6.06061	4.62369e-06
	GO:0010812~negative regulation of cell-substrate adhesion	6	3.0303	7.91537e-06
	GO:0008283~cell proliferation	23	11.6162	7.93919e-06
	GO:0010810~regulation of cell-substrate adhesion	9	4.54545	7.98533e-06
	GO:0051345~positive regulation of hydrolase activity	15	7.57576	8.12733e-06
	GO:0008219~cell death	30	15.1515	9.86018e-06
	GO:0046777~protein amino acid autophosphorylation	11	5.55556	1.02611e-05
	GO:0000165~MAPKKK cascade	15	7.57576	1.09188e-05
	GO:0016265~death	30	15.1515	1.09236e-05
	GO:0051674~localization of cell	19	9.59596	1.1102e-05
	GO:0048870~cell motility	19	9.59596	1.1102e-05
	GO:0002520~immune system development	18	9.09091	1.18024e-05
	GO:0006469~negative regulation of protein kinase activity	11	5.55556	1.19605e-05
	GO:0010605~negative regulation of macromolecule metabolic process	30	15.1515	1.37635e-05
	GO:0035295~tube development	16	8.08081	1.56924e-05
	GO:0033673~negative regulation of kinase activity	11	5.55556	1.58612e-05
	GO:0001775~cell activation	18	9.09091	1.91845e-05
	GO:0043405~regulation of MAP kinase activity	13	6.56566	2.09235e-05
	GO:0051348~negative regulation of transferase activity	11	5.55556	2.73366e-05
	GO:0006928~cell motion	23	11.6162	2.73639e-05
	GO:0031399~regulation of protein modification process	18	9.09091	2.74887e-05
	GO:0014070~response to organic cyclic substance	12	6.06061	3.03972e-05
	GO:0042113~B cell activation	10	5.05051	3.17285e-05
	GO:0019932~second-messenger-mediated signaling	16	8.08081	3.19157e-05
	GO:0040017~positive regulation of locomotion	11	5.55556	3.19818e-05
	GO:0006915~apoptosis	26	13.1313	3.29975e-05
	GO:0030097~hemopoiesis	16	8.08081	3.31547e-05
	GO:0008361~regulation of cell size	15	7.57576	3.41423e-05
	GO:0045786~negative regulation of cell cycle	10	5.05051	5.11149e-05
	GO:0051094~positive regulation of developmental process	17	8.58586	5.19054e-05
	GO:0043627~response to estrogen stimulus	11	5.55556	5.59798e-05
	GO:0042592~homeostatic process	29	14.6465	5.64527e-05
	GO:0002521~leukocyte differentiation	12	6.06061	5.91723e-05
	GO:0051248~negative regulation of protein metabolic process	14	7.07071	5.95571e-05
	GO:0045737~positive regulation of cyclin-dependent protein kinase activity	5	2.52525	6.16836e-05
	GO:0001501~skeletal system development	18	9.09091	6.55458e-05
	GO:0048015~phosphoinositide-mediated signaling	10	5.05051	9.46026e-05
	GO:0048534~hemopoietic or lymphoid organ development	16	8.08081	9.79231e-05
	GO:0030335~positive regulation of cell migration	10	5.05051	0.000101938
	GO:0032270~positive regulation of cellular protein metabolic process	15	7.57576	0.000127056
	GO:0008630~DNA damage response, signal transduction resulting in induction of apoptosis	7	3.53535	0.000133084
	GO:0001932~regulation of protein amino acid phosphorylation	13	6.56566	0.000138685
	GO:0022403~cell cycle phase	20	10.101	0.000140726
	GO:0010035~response to inorganic substance	14	7.07071	0.000148968
	GO:0001953~negative regulation of cell-matrix adhesion	5	2.52525	0.000164221
	GO:0042176~regulation of protein catabolic process	8	4.0404	0.000168443
	GO:0030384~phosphoinositide metabolic process	9	4.54545	0.00017828
	GO:0045321~leukocyte activation	15	7.57576	0.000182086
	GO:0051247~positive regulation of protein metabolic process	15	7.57576	0.000189264
	GO:0001568~blood vessel development	15	7.57576	0.000205475
	GO:0042476~odontogenesis	8	4.0404	0.000208181
	GO:0045792~negative regulation of cell size	10	5.05051	0.000218114
	GO:0007507~heart development	14	7.07071	0.0002302
	GO:0043434~response to peptide hormone stimulus	12	6.06061	0.000231562
	GO:0001944~vasculature development	15	7.57576	0.000259292
	GO:0009991~response to extracellular stimulus	14	7.07071	0.000286705
	GO:0042770~DNA damage response, signal transduction	9	4.54545	0.000323948
	GO:0010647~positive regulation of cell communication	17	8.58586	0.000337549
	GO:0043009~chordate embryonic development	17	8.58586	0.000363818
	GO:0009967~positive regulation of signal transduction	16	8.08081	0.000366578
	GO:0003006~reproductive developmental process	15	7.57576	0.00039607
	GO:0009792~embryonic development ending in birth or egg hatching	17	8.58586	0.000396648
	GO:0032768~regulation of monooxygenase activity	6	3.0303	0.000418188
	GO:0030155~regulation of cell adhesion	11	5.55556	0.000445883
	GO:0007568~aging	10	5.05051	0.000460044
	GO:0046649~lymphocyte activation	13	6.56566	0.000463492
	GO:0000018~regulation of DNA recombination	6	3.0303	0.000496087
	GO:0007162~negative regulation of cell adhesion	7	3.53535	0.000517129
	GO:0032535~regulation of cellular component size	15	7.57576	0.000545009
	GO:0051052~regulation of DNA metabolic process	10	5.05051	0.00058881
	GO:0042326~negative regulation of phosphorylation	7	3.53535	0.000659754
	GO:0043523~regulation of neuron apoptosis	9	4.54545	0.000682747
	GO:0018108~peptidyl-tyrosine phosphorylation	7	3.53535	0.000738832
	GO:0032269~negative regulation of cellular protein metabolic process	12	6.06061	0.000844682
	GO:0030183~B cell differentiation	7	3.53535	0.000931768
	GO:0010563~negative regulation of phosphorus metabolic process	7	3.53535	0.000931768
	GO:0045936~negative regulation of phosphate metabolic process	7	3.53535	0.000931768
	GO:0018212~peptidyl-tyrosine modification	7	3.53535	0.000931768
	GO:0007548~sex differentiation	11	5.55556	0.000938319
	GO:0009894~regulation of catabolic process	9	4.54545	0.0010478
	GO:0042327~positive regulation of phosphorylation	9	4.54545	0.00112033
	GO:0060537~muscle tissue development	10	5.05051	0.00113862
	GO:0000278~mitotic cell cycle	17	8.58586	0.00117616
	GO:0045137~development of primary sexual characteristics	10	5.05051	0.00126149
	GO:0035239~tube morphogenesis	10	5.05051	0.00126149
	GO:0006974~response to DNA damage stimulus	17	8.58586	0.00126495
	GO:0031279~regulation of cyclase activity	9	4.54545	0.00126862
	GO:0030324~lung development	9	4.54545	0.00126862
	GO:0045937~positive regulation of phosphate metabolic process	9	4.54545	0.00133465
	GO:0010562~positive regulation of phosphorus metabolic process	9	4.54545	0.00133465
	GO:0051339~regulation of lyase activity	9	4.54545	0.00142245
	GO:0014065~phosphoinositide 3-kinase cascade	4	2.0202	0.00146217
	GO:0045910~negative regulation of DNA recombination	4	2.0202	0.00146217
	GO:0030323~respiratory tube development	9	4.54545	0.00150473
	GO:0031328~positive regulation of cellular biosynthetic process	24	12.1212	0.00153593
	GO:0045597~positive regulation of cell differentiation	13	6.56566	0.00154325
	GO:0040008~regulation of growth	16	8.08081	0.00155145
	GO:0030098~lymphocyte differentiation	9	4.54545	0.00157008
	GO:0032355~response to estradiol stimulus	7	3.53535	0.00162715
	GO:0031667~response to nutrient levels	12	6.06061	0.00166356
	GO:0051241~negative regulation of multicellular organismal process	11	5.55556	0.00166762
	GO:0048145~regulation of fibroblast proliferation	6	3.0303	0.00181607
	GO:0051051~negative regulation of transport	10	5.05051	0.00182998
	GO:0009891~positive regulation of biosynthetic process	24	12.1212	0.00183333
	GO:0060541~respiratory system development	9	4.54545	0.00209375
	GO:0045787~positive regulation of cell cycle	7	3.53535	0.00211162
	GO:0033554~cellular response to stress	21	10.6061	0.0021394
	GO:0052548~regulation of endopeptidase activity	8	4.0404	0.00222554
	GO:0006952~defense response	22	11.1111	0.0023066
	GO:0030802~regulation of cyclic nucleotide biosynthetic process	9	4.54545	0.00230726
	GO:0045926~negative regulation of growth	9	4.54545	0.00230726
	GO:0030808~regulation of nucleotide biosynthetic process	9	4.54545	0.00230726
	GO:0007584~response to nutrient	10	5.05051	0.00231207
	GO:0008406~gonad development	9	4.54545	0.00258291
	GO:0050865~regulation of cell activation	11	5.55556	0.00262248
	GO:0030799~regulation of cyclic nucleotide metabolic process	9	4.54545	0.00271415
	GO:0007517~muscle organ development	12	6.06061	0.00279289
	GO:0010608~posttranscriptional regulation of gene expression	12	6.06061	0.00279289
	GO:0051053~negative regulation of DNA metabolic process	6	3.0303	0.00282527
	GO:0052547~regulation of peptidase activity	8	4.0404	0.00282671
	GO:0032147~activation of protein kinase activity	9	4.54545	0.00283409
	GO:0043491~protein kinase B signaling cascade	4	2.0202	0.00292409
	GO:0043525~positive regulation of neuron apoptosis	5	2.52525	0.00306943
	GO:0051341~regulation of oxidoreductase activity	6	3.0303	0.00310166
	GO:0006140~regulation of nucleotide metabolic process	9	4.54545	0.00310413
	GO:0048729~tissue morphogenesis	11	5.55556	0.00311156
	GO:0042493~response to drug	12	6.06061	0.00322984
	GO:0051130~positive regulation of cellular component organization	11	5.55556	0.00323441
	GO:0030879~mammary gland development	7	3.53535	0.00327956
	GO:0006650~glycerophospholipid metabolic process	9	4.54545	0.00339397
	GO:0008585~female gonad development	7	3.53535	0.00353758
	GO:0000075~cell cycle checkpoint	8	4.0404	0.00377309
	GO:0030308~negative regulation of cell growth	8	4.0404	0.00401365
	GO:0042698~ovulation cycle	7	3.53535	0.00447208
	GO:0010557~positive regulation of macromolecule biosynthetic process	22	11.1111	0.00464179
	GO:0045862~positive regulation of proteolysis	5	2.52525	0.00477824
	GO:0050680~negative regulation of epithelial cell proliferation	5	2.52525	0.00477824
	GO:0048608~reproductive structure development	9	4.54545	0.00506971
	GO:0048598~embryonic morphogenesis	14	7.07071	0.00508772
	GO:0048010~vascular endothelial growth factor receptor signaling pathway	4	2.0202	0.00509546
	GO:0001822~kidney development	8	4.0404	0.00509629
	GO:0045761~regulation of adenylate cyclase activity	8	4.0404	0.00509629
	GO:0046660~female sex differentiation	7	3.53535	0.00511014
	GO:0046545~development of primary female sexual characteristics	7	3.53535	0.00511014
	GO:0048660~regulation of smooth muscle cell proliferation	6	3.0303	0.00547111
	GO:0010038~response to metal ion	9	4.54545	0.00578287
	GO:0048609~reproductive process in a multicellular organism	18	9.09091	0.00645816
	GO:0032504~multicellular organism reproduction	18	9.09091	0.00645816
	GO:0030817~regulation of cAMP biosynthetic process	8	4.0404	0.00664734
	GO:0002694~regulation of leukocyte activation	10	5.05051	0.00680439
	GO:0035234~germ cell programmed cell death	3	1.51515	0.00688596
	GO:0043406~positive regulation of MAP kinase activity	8	4.0404	0.00694715
	GO:0030814~regulation of cAMP metabolic process	8	4.0404	0.00732847
	GO:0048732~gland development	9	4.54545	0.00754655
	GO:0008543~fibroblast growth factor receptor signaling pathway	5	2.52525	0.00794195
	GO:0018105~peptidyl-serine phosphorylation	5	2.52525	0.00794195
	GO:0007265~Ras protein signal transduction	8	4.0404	0.00809897
	GO:0050864~regulation of B cell activation	6	3.0303	0.00837303
	GO:0051173~positive regulation of nitrogen compound metabolic process	21	10.6061	0.00884342
	GO:0002377~immunoglobulin production	5	2.52525	0.0088854
	GO:0010648~negative regulation of cell communication	12	6.06061	0.0089372
	GO:0043281~regulation of caspase activity	7	3.53535	0.00962398
	GO:0034097~response to cytokine stimulus	7	3.53535	0.00962398
	GO:0070482~response to oxygen levels	9	4.54545	0.00964985
	GO:0030162~regulation of proteolysis	6	3.0303	0.00970989
	GO:0002440~production of molecular mediator of immune response	5	2.52525	0.00984902
	GO:0001655~urogenital system development	8	4.0404	0.0102159
	GO:0048878~chemical homeostasis	18	9.09091	0.0103092
	GO:0006919~activation of caspase activity	6	3.0303	0.0103807
	GO:0007611~learning or memory	8	4.0404	0.0106248
	GO:0060021~palate development	5	2.52525	0.0108726
	GO:0032369~negative regulation of lipid transport	4	2.0202	0.0118415
	GO:0002683~negative regulation of immune system process	7	3.53535	0.0118961
	GO:0046324~regulation of glucose import	5	2.52525	0.0120644
	GO:0031659~positive regulation of cyclin-dependent protein kinase activity during G1/S	3	1.51515	0.012262
	GO:0031657~regulation of cyclin-dependent protein kinase activity during G1/S	3	1.51515	0.012262
	GO:0009968~negative regulation of signal transduction	11	5.55556	0.0123803
	GO:0051249~regulation of lymphocyte activation	9	4.54545	0.0124264
	GO:0051050~positive regulation of transport	11	5.55556	0.013085
	GO:0031960~response to corticosteroid stimulus	7	3.53535	0.0131033
	GO:0010827~regulation of glucose transport	5	2.52525	0.0131598
	GO:0007346~regulation of mitotic cell cycle	9	4.54545	0.0144696
	GO:0043280~positive regulation of caspase activity	6	3.0303	0.0146168
	GO:0010952~positive regulation of peptidase activity	6	3.0303	0.0146168
	GO:0031400~negative regulation of protein modification process	8	4.0404	0.0148246
	GO:0014706~striated muscle tissue development	8	4.0404	0.0148246
	GO:0010628~positive regulation of gene expression	19	9.59596	0.0148364
	GO:0044057~regulation of system process	13	6.56566	0.0148984
	GO:0031644~regulation of neurological system process	9	4.54545	0.01492
	GO:0006644~phospholipid metabolic process	10	5.05051	0.0150188
	GO:0051146~striated muscle cell differentiation	7	3.53535	0.0150677
	GO:0007179~transforming growth factor beta receptor signaling pathway	6	3.0303	0.0152297
	GO:0010212~response to ionizing radiation	6	3.0303	0.0152297
	GO:0007423~sensory organ development	11	5.55556	0.0152899
	GO:0043407~negative regulation of MAP kinase activity	5	2.52525	0.0155796
	GO:0031331~positive regulation of cellular catabolic process	5	2.52525	0.0155796
	GO:0001934~positive regulation of protein amino acid phosphorylation	7	3.53535	0.0156991
	GO:0070201~regulation of establishment of protein localization	8	4.0404	0.0157727
	GO:0042177~negative regulation of protein catabolic process	4	2.0202	0.015789
	GO:0002053~positive regulation of mesenchymal cell proliferation	4	2.0202	0.015789
	GO:0050866~negative regulation of cell activation	6	3.0303	0.0160577
	GO:0001558~regulation of cell growth	10	5.05051	0.0167243
	GO:0009895~negative regulation of catabolic process	5	2.52525	0.0168433
	GO:0022602~ovulation cycle process	6	3.0303	0.0170504
	GO:0032101~regulation of response to external stimulus	9	4.54545	0.0177715
	GO:0016447~somatic recombination of immunoglobulin gene segments	4	2.0202	0.0179838
	GO:0050869~negative regulation of B cell activation	4	2.0202	0.0179838
	GO:0010464~regulation of mesenchymal cell proliferation	4	2.0202	0.0179838
	GO:0010558~negative regulation of macromolecule biosynthetic process	18	9.09091	0.0180486
	GO:0045765~regulation of angiogenesis	6	3.0303	0.0180818
	GO:0045619~regulation of lymphocyte differentiation	6	3.0303	0.0180818
	GO:0010623~developmental programmed cell death	3	1.51515	0.0181501
	GO:0046486~glycerolipid metabolic process	9	4.54545	0.019567
	GO:0034504~protein localization in nucleus	7	3.53535	0.0196536
	GO:0070271~protein complex biogenesis	17	8.58586	0.0196686
	GO:0006461~protein complex assembly	17	8.58586	0.0196686
	GO:0042475~odontogenesis of dentine-containing tooth	5	2.52525	0.0196887
	GO:0018209~peptidyl-serine modification	5	2.52525	0.0196887
	GO:0060326~cell chemotaxis	5	2.52525	0.0196887
	GO:0019637~organophosphate metabolic process	10	5.05051	0.0197246
	GO:0043062~extracellular structure organization	9	4.54545	0.0199027
	GO:0048511~rhythmic process	8	4.0404	0.0203519
	GO:0048483~autonomic nervous system development	4	2.0202	0.0204576
	GO:0045934~negative regulation of nucleobase, nucleoside, nucleotide and nucleic acid metabolic process	17	8.58586	0.022194
	GO:0060562~epithelial tube morphogenesis	6	3.0303	0.022603
	GO:0050679~positive regulation of epithelial cell proliferation	5	2.52525	0.0230456
	GO:0032869~cellular response to insulin stimulus	6	3.0303	0.0239241
	GO:0021915~neural tube development	6	3.0303	0.0239241
	GO:0050730~regulation of peptidyl-tyrosine phosphorylation	6	3.0303	0.0239241
	GO:0032870~cellular response to hormone stimulus	8	4.0404	0.0246324
	GO:0031647~regulation of protein stability	5	2.52525	0.0247948
	GO:0051172~negative regulation of nitrogen compound metabolic process	17	8.58586	0.0248768
	GO:0010627~regulation of protein kinase cascade	11	5.55556	0.024964
	GO:0032868~response to insulin stimulus	7	3.53535	0.0252737
	GO:0048872~homeostasis of number of cells	7	3.53535	0.0252737
	GO:0045429~positive regulation of nitric oxide biosynthetic process	4	2.0202	0.0264069
	GO:0007369~gastrulation	6	3.0303	0.0264205
	GO:0001838~embryonic epithelial tube formation	5	2.52525	0.0264231
	GO:0048514~blood vessel morphogenesis	10	5.05051	0.0264565
	GO:0009890~negative regulation of biosynthetic process	18	9.09091	0.0266216
	GO:0032386~regulation of intracellular transport	6	3.0303	0.0276758
	GO:0007178~transmembrane receptor protein serine/threonine kinase signaling pathway	7	3.53535	0.0283918
	GO:0035148~tube lumen formation	5	2.52525	0.0284095
	GO:0032880~regulation of protein localization	8	4.0404	0.0287771
	GO:0010828~positive regulation of glucose transport	4	2.0202	0.0292423
	GO:0046326~positive regulation of glucose import	4	2.0202	0.0292423
	GO:0016445~somatic diversification of immunoglobulins	4	2.0202	0.0292423
	GO:0045165~cell fate commitment	8	4.0404	0.0297221
	GO:0009952~anterior/posterior pattern formation	8	4.0404	0.0307961
	GO:0010332~response to gamma radiation	4	2.0202	0.0327575
	GO:0051095~regulation of helicase activity	3	1.51515	0.0327898
	GO:0060558~regulation of calcidiol 1-monooxygenase activity	3	1.51515	0.0327898
	GO:0002320~lymphoid progenitor cell differentiation	3	1.51515	0.0327898
	GO:0044087~regulation of cellular component biogenesis	8	4.0404	0.0329102
	GO:0002562~somatic diversification of immune receptors via germline recombination within a single locus	4	2.0202	0.0367247
	GO:0016444~somatic cell DNA recombination	4	2.0202	0.0367247
	GO:0035282~segmentation	5	2.52525	0.0374565
	GO:0000077~DNA damage checkpoint	5	2.52525	0.0374565
	GO:0033365~protein localization in organelle	8	4.0404	0.037688
	GO:0007389~pattern specification process	11	5.55556	0.0378006
	GO:0051969~regulation of transmission of nerve impulse	8	4.0404	0.0389534
	GO:0051384~response to glucocorticoid stimulus	6	3.0303	0.039107
	GO:0042593~glucose homeostasis	5	2.52525	0.0396084
	GO:0033500~carbohydrate homeostasis	5	2.52525	0.0396084
	GO:0009896~positive regulation of catabolic process	5	2.52525	0.0396084
	GO:0001525~angiogenesis	8	4.0404	0.0399758
	GO:0031401~positive regulation of protein modification process	9	4.54545	0.0400279
	GO:0008624~induction of apoptosis by extracellular signals	7	3.53535	0.0401188
	GO:0055093~response to hyperoxia	3	1.51515	0.0411019
	GO:0051893~regulation of focal adhesion formation	3	1.51515	0.0411019
	GO:0055074~calcium ion homeostasis	9	4.54545	0.0411078
	GO:0050801~ion homeostasis	14	7.07071	0.0420576
	GO:0034613~cellular protein localization	14	7.07071	0.0435953
	GO:0051353~positive regulation of oxidoreductase activity	4	2.0202	0.0438956
	GO:0048146~positive regulation of fibroblast proliferation	4	2.0202	0.0438956
	GO:0043524~negative regulation of neuron apoptosis	5	2.52525	0.0442392
	GO:0042060~wound healing	9	4.54545	0.0442403
	GO:0070727~cellular macromolecule localization	14	7.07071	0.0456059
	GO:0031327~negative regulation of cellular biosynthetic process	17	8.58586	0.0456188
	GO:0051098~regulation of binding	8	4.0404	0.0456775
	GO:0031570~DNA integrity checkpoint	5	2.52525	0.0465772
	GO:0045732~positive regulation of protein catabolic process	4	2.0202	0.0476719
	GO:0002200~somatic diversification of immune receptors	4	2.0202	0.0476719
	GO:0045428~regulation of nitric oxide biosynthetic process	4	2.0202	0.0476719
	GO:0008542~visual learning	4	2.0202	0.0476719
	GO:0044271~nitrogen compound biosynthetic process	12	6.06061	0.0485692
	GO:0006913~nucleocytoplasmic transport	8	4.0404	0.049898
	GO:0002566~somatic diversification of immune receptors via somatic mutation	3	1.51515	0.0499455
	GO:0048009~insulin-like growth factor receptor signaling pathway	3	1.51515	0.0499455
	GO:0016446~somatic hypermutation of immunoglobulin genes	3	1.51515	0.0499455
	GO:0008635~activation of caspase activity by cytochrome c	3	1.51515	0.0499455

## Sheet: OV
Category	Term	Count	%	Benjamini		Category	Term	Count	%	Benjamini		Category	Term	Count	%	Benjamini		Category	Term	Count	%	Benjamini
GOTERM_BP_FAT	GO:0007242~intracellular signaling cascade	81	40.5	7.16725e-29		GOTERM_CC_FAT	GO:0005829~cytosol	58	29	7.79377e-13		GOTERM_MF_FAT	GO:0004672~protein kinase activity	45	22.5	1.54773e-16		KEGG_PATHWAY	hsa05200:Pathways in cancer	74	37	1.47396e-38
	GO:0006793~phosphorus metabolic process	64	32	4.89067e-22			GO:0005626~insoluble fraction	34	17	5.44934e-06			GO:0005524~ATP binding	63	31.5	9.8721e-13			hsa04510:Focal adhesion	46	23	1.36612e-22
	GO:0006796~phosphate metabolic process	64	32	4.89067e-22			GO:0005886~plasma membrane	88	44	6.65555e-06			GO:0032559~adenyl ribonucleotide binding	63	31.5	1.24878e-12			hsa05215:Prostate cancer	28	14	8.03825e-17
	GO:0006468~protein amino acid phosphorylation	53	26.5	2.75839e-21			GO:0044459~plasma membrane part	60	30	1.41887e-05			GO:0001883~purine nucleoside binding	64	32	5.72076e-12			hsa04916:Melanogenesis	29	14.5	1.07785e-16
	GO:0016310~phosphorylation	57	28.5	4.97311e-21			GO:0005912~adherens junction	14	7	1.42943e-05			GO:0001882~nucleoside binding	64	32	6.29785e-12			hsa05222:Small cell lung cancer	27	13.5	1.23834e-16
	GO:0010033~response to organic substance	53	26.5	5.97925e-20			GO:0000267~cell fraction	38	19	1.63572e-05			GO:0030554~adenyl nucleotide binding	63	31.5	6.90203e-12			hsa04062:Chemokine signaling pathway	37	18.5	5.73317e-16
	GO:0009725~response to hormone stimulus	39	19.5	2.63801e-19			GO:0070161~anchoring junction	14	7	4.07963e-05			GO:0032553~ribonucleotide binding	67	33.5	4.69955e-11			hsa04912:GnRH signaling pathway	28	14	6.33448e-16
	GO:0009719~response to endogenous stimulus	40	20	8.44637e-19			GO:0042995~cell projection	28	14	4.85179e-05			GO:0032555~purine ribonucleotide binding	67	33.5	4.69955e-11			hsa04012:ErbB signaling pathway	26	13	1.88738e-15
	GO:0043067~regulation of programmed cell death	54	27	1.31022e-18			GO:0005606~laminin-1 complex	5	2.5	5.40457e-05			GO:0019899~enzyme binding	34	17	5.35625e-11			hsa04310:Wnt signaling pathway	32	16	1.4877e-14
	GO:0010941~regulation of cell death	54	27	1.3771e-18			GO:0005624~membrane fraction	30	15	8.0372e-05			GO:0004674~protein serine/threonine kinase activity	31	15.5	5.73215e-11			hsa05213:Endometrial cancer	20	10	7.88258e-14
	GO:0051338~regulation of transferase activity	38	19	2.34373e-18			GO:0043256~laminin complex	5	2.5	0.000138434			GO:0017076~purine nucleotide binding	67	33.5	2.50387e-10			hsa05220:Chronic myeloid leukemia	23	11.5	9.33698e-14
	GO:0042981~regulation of apoptosis	53	26.5	3.68686e-18			GO:0044420~extracellular matrix part	11	5.5	0.000141801			GO:0019900~kinase binding	20	10	6.46929e-10			hsa05210:Colorectal cancer	24	12	1.06581e-13
	GO:0043549~regulation of kinase activity	37	18.5	4.37477e-18			GO:0016323~basolateral plasma membrane	14	7	0.000151277			GO:0000166~nucleotide binding	69	34.5	2.84534e-08			hsa04660:T cell receptor signaling pathway	26	13	4.4742e-13
	GO:0042325~regulation of phosphorylation	41	20.5	8.71167e-18			GO:0031012~extracellular matrix	18	9	0.000161576			GO:0019901~protein kinase binding	15	7.5	1.16648e-06			hsa05214:Glioma	20	10	3.19644e-12
	GO:0044093~positive regulation of molecular function	45	22.5	1.54929e-17			GO:0005913~cell-cell adherens junction	7	3.5	0.000182049			GO:0004713~protein tyrosine kinase activity	15	7.5	5.00435e-06			hsa04722:Neurotrophin signaling pathway	26	13	1.12094e-11
	GO:0051174~regulation of phosphorus metabolic process	41	20.5	3.17583e-17			GO:0030017~sarcomere	10	5	0.000191679			GO:0043560~insulin receptor substrate binding	6	3	8.54938e-06			hsa04720:Long-term potentiation	20	10	1.30165e-11
	GO:0019220~regulation of phosphate metabolic process	41	20.5	3.17583e-17			GO:0005578~proteinaceous extracellular matrix	17	8.5	0.000209974			GO:0005516~calmodulin binding	13	6.5	2.92577e-05			hsa04010:MAPK signaling pathway	37	18.5	2.71251e-11
	GO:0033674~positive regulation of kinase activity	30	15	5.58226e-17			GO:0030016~myofibril	10	5	0.000468579			GO:0005509~calcium ion binding	34	17	3.87682e-05			hsa05221:Acute myeloid leukemia	18	9	7.82984e-11
	GO:0045859~regulation of protein kinase activity	35	17.5	8.1181e-17			GO:0044449~contractile fiber part	10	5	0.000512133			GO:0019904~protein domain specific binding	19	9.5	4.71374e-05			hsa04810:Regulation of actin cytoskeleton	32	16	1.65077e-10
	GO:0007243~protein kinase cascade	36	18	8.23885e-17			GO:0045121~membrane raft	11	5.5	0.000540527			GO:0005201~extracellular matrix structural constituent	10	5	0.000111183			hsa05218:Melanoma	19	9.5	2.53326e-10
	GO:0051347~positive regulation of transferase activity	30	15	1.36367e-16			GO:0043235~receptor complex	10	5	0.000570936			GO:0004714~transmembrane receptor protein tyrosine kinase activity	9	4.5	0.000134166			hsa04020:Calcium signaling pathway	27	13.5	4.26363e-09
	GO:0007166~cell surface receptor linked signal transduction	77	38.5	2.58255e-16			GO:0043292~contractile fiber	10	5	0.000760882			GO:0004709~MAP kinase kinase kinase activity	6	3	0.00013964			hsa04540:Gap junction	19	9.5	1.25669e-08
	GO:0043085~positive regulation of catalytic activity	41	20.5	2.69355e-16			GO:0005605~basal lamina	5	2.5	0.00114547			GO:0016563~transcription activator activity	20	10	0.000204545			hsa05211:Renal cell carcinoma	17	8.5	1.49348e-08
	GO:0045860~positive regulation of protein kinase activity	28	14	1.90469e-15			GO:0030425~dendrite	11	5.5	0.00136693			GO:0004016~adenylate cyclase activity	5	2.5	0.000406113			hsa04914:Progesterone-mediated oocyte maturation	18	9	4.78604e-08
	GO:0060548~negative regulation of cell death	32	16	1.13354e-13			GO:0005604~basement membrane	8	4	0.0014553			GO:0004435~phosphoinositide phospholipase C activity	6	3	0.000519536			hsa04910:Insulin signaling pathway	22	11	7.06178e-08
	GO:0043069~negative regulation of programmed cell death	32	16	1.18239e-13			GO:0005856~cytoskeleton	37	18.5	0.00189499			GO:0005198~structural molecule activity	24	12	0.00105135			hsa04270:Vascular smooth muscle contraction	20	10	8.12087e-08
	GO:0007167~enzyme linked receptor protein signaling pathway	31	15.5	2.17604e-13			GO:0044421~extracellular region part	29	14.5	0.00196258			GO:0008013~beta-catenin binding	6	3	0.00121139			hsa05219:Bladder cancer	13	6.5	8.98799e-08
	GO:0043066~negative regulation of apoptosis	31	15.5	5.33573e-13			GO:0030055~cell-substrate junction	9	4.5	0.00209967			GO:0004629~phospholipase C activity	6	3	0.00137426			hsa05212:Pancreatic cancer	16	8	1.5253e-07
	GO:0042127~regulation of cell proliferation	45	22.5	5.94413e-13			GO:0005916~fascia adherens	4	2	0.00358312			GO:0019838~growth factor binding	9	4.5	0.00245593			hsa05216:Thyroid cancer	11	5.5	1.79389e-07
	GO:0008284~positive regulation of cell proliferation	33	16.5	7.48068e-13			GO:0043005~neuron projection	15	7.5	0.00358668			GO:0032403~protein complex binding	12	6	0.00247507			hsa04512:ECM-receptor interaction	17	8.5	1.87401e-07
	GO:0007169~transmembrane receptor protein tyrosine kinase signaling pathway	24	12	1.59264e-11			GO:0030054~cell junction	19	9.5	0.00369559			GO:0035258~steroid hormone receptor binding	6	3	0.00335835			hsa04070:Phosphatidylinositol signaling system	16	8	2.03838e-07
	GO:0000165~MAPKKK cascade	22	11	2.28575e-11			GO:0030027~lamellipodium	7	3.5	0.00459913			GO:0019903~protein phosphatase binding	6	3	0.00368333			hsa04520:Adherens junction	16	8	3.46558e-07
	GO:0010604~positive regulation of macromolecule metabolic process	44	22	4.65566e-11			GO:0005942~phosphoinositide 3-kinase complex	4	2	0.0056502			GO:0016849~phosphorus-oxygen lyase activity	5	2.5	0.00383764			hsa05414:Dilated cardiomyopathy	17	8.5	6.48999e-07
	GO:0040012~regulation of locomotion	22	11	4.98533e-11			GO:0008305~integrin complex	5	2.5	0.00676993			GO:0009975~cyclase activity	5	2.5	0.00445202			hsa04530:Tight junction	20	10	1.21752e-06
	GO:0032870~cellular response to hormone stimulus	19	9.5	5.91157e-11			GO:0005901~caveola	6	3	0.00757232			GO:0043548~phosphoinositide 3-kinase binding	4	2	0.00466461			hsa05223:Non-small cell lung cancer	13	6.5	1.4592e-06
	GO:0010627~regulation of protein kinase cascade	24	12	1.27706e-10			GO:0016328~lateral plasma membrane	4	2	0.00838524			GO:0042169~SH2 domain binding	5	2.5	0.0049784			hsa04662:B cell receptor signaling pathway	15	7.5	1.48072e-06
	GO:0030334~regulation of cell migration	20	10	3.69227e-10			GO:0014704~intercalated disc	4	2	0.0100866			GO:0019992~diacylglycerol binding	7	3.5	0.00561115			hsa04664:Fc epsilon RI signaling pathway	15	7.5	2.38702e-06
	GO:0009891~positive regulation of biosynthetic process	38	19	3.93984e-10			GO:0005654~nucleoplasm	25	12.5	0.0110561			GO:0019902~phosphatase binding	6	3	0.00563249			hsa04930:Type II diabetes mellitus	12	6	2.39455e-06
	GO:0051270~regulation of cell motion	21	10.5	4.31208e-10			GO:0032982~myosin filament	4	2	0.0194803			GO:0042802~identical protein binding	22	11	0.00574619			hsa04730:Long-term depression	14	7	3.23103e-06
	GO:0032147~activation of protein kinase activity	17	8.5	5.70988e-10			GO:0042383~sarcolemma	6	3	0.0207009			GO:0016303~1-phosphatidylinositol-3-kinase activity	4	2	0.00582704			hsa04650:Natural killer cell mediated cytotoxicity	19	9.5	4.36164e-06
	GO:0030155~regulation of cell adhesion	18	9	9.26357e-10			GO:0000159~protein phosphatase type 2A complex	4	2	0.0215595			GO:0050681~androgen receptor binding	5	2.5	0.00598689			hsa04210:Apoptosis	15	7.5	8.50312e-06
	GO:0031328~positive regulation of cellular biosynthetic process	37	18.5	1.04034e-09			GO:0005859~muscle myosin complex	4	2	0.0215595			GO:0035004~phosphoinositide 3-kinase activity	4	2	0.00693231			hsa05412:Arrhythmogenic right ventricular cardiomyopathy (ARVC)	14	7	9.45243e-06
	GO:0046777~protein amino acid autophosphorylation	15	7.5	1.19204e-09			GO:0005925~focal adhesion	7	3.5	0.0241804			GO:0050839~cell adhesion molecule binding	5	2.5	0.00996518			hsa04620:Toll-like receptor signaling pathway	16	8	9.99288e-06
	GO:0010557~positive regulation of macromolecule biosynthetic process	36	18	1.19575e-09			GO:0031981~nuclear lumen	34	17	0.0245048			GO:0004707~MAP kinase activity	4	2	0.0104419			hsa04114:Oocyte meiosis	16	8	2.88287e-05
	GO:0048545~response to steroid hormone stimulus	20	10	2.88775e-09			GO:0031252~cell leading edge	8	4	0.025006			GO:0008289~lipid binding	17	8.5	0.0105965			hsa04621:NOD-like receptor signaling pathway	12	6	3.63999e-05
	GO:0043434~response to peptide hormone stimulus	18	9	5.43507e-09			GO:0016460~myosin II complex	4	2	0.0253948			GO:0000287~magnesium ion binding	17	8.5	0.0106077			hsa04370:VEGF signaling pathway	13	6.5	4.29179e-05
	GO:0040017~positive regulation of locomotion	15	7.5	7.89691e-09			GO:0044430~cytoskeletal part	25	12.5	0.0254274			GO:0004697~protein kinase C activity	4	2	0.0123399			hsa00562:Inositol phosphate metabolism	11	5.5	5.927e-05
	GO:0009628~response to abiotic stimulus	26	13	8.22771e-09			GO:0005924~cell-substrate adherens junction	7	3.5	0.0267534			GO:0004620~phospholipase activity	7	3.5	0.0133429			hsa04670:Leukocyte transendothelial migration	16	8	6.2737e-05
	GO:0043065~positive regulation of apoptosis	28	14	8.2912e-09			GO:0030018~Z disc	5	2.5	0.0271795			GO:0008081~phosphoric diester hydrolase activity	7	3.5	0.0138976			hsa05217:Basal cell carcinoma	11	5.5	6.72933e-05
	GO:0043068~positive regulation of programmed cell death	28	14	9.4885e-09			GO:0045202~synapse	13	6.5	0.0289066			GO:0051427~hormone receptor binding	7	3.5	0.0172683			hsa04920:Adipocytokine signaling pathway	11	5.5	0.000380822
	GO:0032868~response to insulin stimulus	15	7.5	9.57361e-09			GO:0005938~cell cortex	8	4	0.0299664			GO:0043559~insulin binding	3	1.5	0.0189098			hsa04350:TGF-beta signaling pathway	12	6	0.000792439
	GO:0010942~positive regulation of cell death	28	14	1.00992e-08			GO:0044433~cytoplasmic vesicle part	9	4.5	0.0316574			GO:0016298~lipase activity	7	3.5	0.0313792			hsa04144:Endocytosis	18	9	0.000964325
	GO:0008219~cell death	36	18	1.32875e-08			GO:0005863~striated muscle thick filament	3	1.5	0.0339898			GO:0043565~sequence-specific DNA binding	19	9.5	0.0318312			hsa04630:Jak-STAT signaling pathway	16	8	0.00128857
	GO:0006928~cell motion	29	14.5	1.42389e-08			GO:0034704~calcium channel complex	4	2	0.0388324			GO:0008134~transcription factor binding	17	8.5	0.031951			hsa04960:Aldosterone-regulated sodium reabsorption	8	4	0.0015678
	GO:0016265~death	36	18	1.54128e-08			GO:0005792~microsome	10	5	0.0388899			GO:0001784~phosphotyrosine binding	3	1.5	0.0357912			hsa05120:Epithelial cell signaling in Helicobacter pylori infection	10	5	0.00186281
	GO:0016477~cell migration	22	11	2.94839e-08			GO:0042598~vesicular fraction	10	5	0.0441877			GO:0046332~SMAD binding	5	2.5	0.0372917			hsa05410:Hypertrophic cardiomyopathy (HCM)	11	5.5	0.00241449
	GO:0048870~cell motility	23	11.5	3.45865e-08			GO:0031674~I band	5	2.5	0.0446792			GO:0035257~nuclear hormone receptor binding	6	3	0.0438599			hsa04622:RIG-I-like receptor signaling pathway	10	5	0.00246989
	GO:0051674~localization of cell	23	11.5	3.45865e-08			GO:0030132~clathrin coat of coated pit	3	1.5	0.0486328			GO:0005262~calcium channel activity	6	3	0.0479259			hsa05416:Viral myocarditis	9	4.5	0.00970082
	GO:0016055~Wnt receptor signaling pathway	16	8	4.16379e-08															hsa04360:Axon guidance	12	6	0.0169348
	GO:0051173~positive regulation of nitrogen compound metabolic process	33	16.5	4.6612e-08															hsa04666:Fc gamma R-mediated phagocytosis	10	5	0.0173037
	GO:0012501~programmed cell death	32	16	5.23306e-08															hsa04115:p53 signaling pathway	8	4	0.025827
	GO:0051272~positive regulation of cell motion	14	7	7.15637e-08															hsa05016:Huntington's disease	14	7	0.0312627
	GO:0030335~positive regulation of cell migration	13	6.5	2.50483e-07															hsa05010:Alzheimer's disease	13	6.5	0.0332144
	GO:0043408~regulation of MAPKKK cascade	14	7	2.61641e-07															hsa04110:Cell cycle	11	5.5	0.0334628
	GO:0043523~regulation of neuron apoptosis	13	6.5	2.76146e-07															hsa04340:Hedgehog signaling pathway	7	3.5	0.0339174
	GO:0045935~positive regulation of nucleobase, nucleoside, nucleotide and nucleic acid metabolic process	31	15.5	3.20454e-07
	GO:0006915~apoptosis	30	15	5.51974e-07
	GO:0031589~cell-substrate adhesion	13	6.5	6.94644e-07
	GO:0043405~regulation of MAP kinase activity	15	7.5	6.98477e-07
	GO:0051094~positive regulation of developmental process	20	10	9.36681e-07
	GO:0032268~regulation of cellular protein metabolic process	26	13	9.87881e-07
	GO:0001932~regulation of protein amino acid phosphorylation	16	8	1.27099e-06
	GO:0009314~response to radiation	17	8.5	1.35162e-06
	GO:0043627~response to estrogen stimulus	13	6.5	1.41874e-06
	GO:0001775~cell activation	20	10	1.45234e-06
	GO:0032869~cellular response to insulin stimulus	11	5.5	1.67767e-06
	GO:0006916~anti-apoptosis	17	8.5	1.94941e-06
	GO:0002521~leukocyte differentiation	14	7	1.995e-06
	GO:0051052~regulation of DNA metabolic process	13	6.5	3.34374e-06
	GO:0032880~regulation of protein localization	14	7	3.56397e-06
	GO:0045596~negative regulation of cell differentiation	17	8.5	3.59762e-06
	GO:0045893~positive regulation of transcription, DNA-dependent	25	12.5	3.98742e-06
	GO:0070482~response to oxygen levels	14	7	4.47981e-06
	GO:0051254~positive regulation of RNA metabolic process	25	12.5	4.48364e-06
	GO:0009894~regulation of catabolic process	12	6	4.50999e-06
	GO:0009968~negative regulation of signal transduction	17	8.5	4.57418e-06
	GO:0006917~induction of apoptosis	20	10	6.86534e-06
	GO:0012502~induction of programmed cell death	20	10	7.12911e-06
	GO:0045597~positive regulation of cell differentiation	17	8.5	7.19066e-06
	GO:0018108~peptidyl-tyrosine phosphorylation	9	4.5	8.34139e-06
	GO:0010035~response to inorganic substance	16	8	9.21729e-06
	GO:0031399~regulation of protein modification process	19	9.5	9.28628e-06
	GO:0010628~positive regulation of gene expression	27	13.5	9.88291e-06
	GO:0006461~protein complex assembly	25	12.5	9.96371e-06
	GO:0070271~protein complex biogenesis	25	12.5	9.96371e-06
	GO:0030097~hemopoiesis	17	8.5	1.01162e-05
	GO:0046324~regulation of glucose import	8	4	1.05497e-05
	GO:0018212~peptidyl-tyrosine modification	9	4.5	1.08885e-05
	GO:0010827~regulation of glucose transport	8	4	1.2845e-05
	GO:0045944~positive regulation of transcription from RNA polymerase II promoter	21	10.5	1.33317e-05
	GO:0001666~response to hypoxia	13	6.5	1.54837e-05
	GO:0002520~immune system development	18	9	1.55309e-05
	GO:0001568~blood vessel development	17	8.5	1.56067e-05
	GO:0007160~cell-matrix adhesion	11	5.5	1.57794e-05
	GO:0048732~gland development	13	6.5	1.58014e-05
	GO:0051051~negative regulation of transport	13	6.5	1.58014e-05
	GO:0007611~learning or memory	12	6	1.58788e-05
	GO:0042493~response to drug	16	8	1.58841e-05
	GO:0007260~tyrosine phosphorylation of STAT protein	5	2.5	1.59923e-05
	GO:0019216~regulation of lipid metabolic process	12	6	1.68888e-05
	GO:0010648~negative regulation of cell communication	17	8.5	1.70529e-05
	GO:0045941~positive regulation of transcription	26	13	1.71647e-05
	GO:0033554~cellular response to stress	26	13	1.8148e-05
	GO:0001944~vasculature development	17	8.5	1.94379e-05
	GO:0051050~positive regulation of transport	16	8	2.18784e-05
	GO:0007155~cell adhesion	29	14.5	2.64882e-05
	GO:0022610~biological adhesion	29	14.5	2.69998e-05
	GO:0007259~JAK-STAT cascade	8	4	2.90208e-05
	GO:0048534~hemopoietic or lymphoid organ development	17	8.5	2.96394e-05
	GO:0014065~phosphoinositide 3-kinase cascade	5	2.5	3.20759e-05
	GO:0014070~response to organic cyclic substance	12	6	3.31694e-05
	GO:0010647~positive regulation of cell communication	19	9.5	3.40135e-05
	GO:0030518~steroid hormone receptor signaling pathway	9	4.5	3.88769e-05
	GO:0007346~regulation of mitotic cell cycle	13	6.5	4.84215e-05
	GO:0043406~positive regulation of MAP kinase activity	11	5.5	4.85855e-05
	GO:0080135~regulation of cellular response to stress	11	5.5	5.26933e-05
	GO:0007517~muscle organ development	15	7.5	5.38288e-05
	GO:0051247~positive regulation of protein metabolic process	16	8	5.71587e-05
	GO:0007265~Ras protein signal transduction	11	5.5	6.1304e-05
	GO:0045471~response to ethanol	9	4.5	7.86189e-05
	GO:0046328~regulation of JNK cascade	9	4.5	8.78365e-05
	GO:0000902~cell morphogenesis	19	9.5	9.44409e-05
	GO:0051960~regulation of nervous system development	14	7	9.51836e-05
	GO:0009416~response to light stimulus	12	6	0.000108265
	GO:0031344~regulation of cell projection organization	10	5	0.000112101
	GO:0007584~response to nutrient	12	6	0.000122492
	GO:0009896~positive regulation of catabolic process	8	4	0.000122596
	GO:0009967~positive regulation of signal transduction	17	8.5	0.000129668
	GO:0070302~regulation of stress-activated protein kinase signaling pathway	9	4.5	0.00013015
	GO:0006816~calcium ion transport	12	6	0.000135237
	GO:0051726~regulation of cell cycle	18	9	0.000135733
	GO:0000060~protein import into nucleus, translocation	7	3.5	0.000154633
	GO:0043524~negative regulation of neuron apoptosis	8	4	0.000155312
	GO:0019932~second-messenger-mediated signaling	15	7.5	0.000163379
	GO:0051291~protein heterooligomerization	8	4	0.000173467
	GO:0042176~regulation of protein catabolic process	8	4	0.000173467
	GO:0009611~response to wounding	23	11.5	0.000180034
	GO:0070201~regulation of establishment of protein localization	11	5.5	0.000191735
	GO:0044057~regulation of system process	17	8.5	0.000215423
	GO:0042476~odontogenesis	8	4	0.000217799
	GO:0030522~intracellular receptor-mediated signaling pathway	9	4.5	0.000225155
	GO:0042592~homeostatic process	28	14	0.000228393
	GO:0010828~positive regulation of glucose transport	6	3	0.000228857
	GO:0046326~positive regulation of glucose import	6	3	0.000228857
	GO:0051130~positive regulation of cellular component organization	13	6.5	0.000233942
	GO:0000904~cell morphogenesis involved in differentiation	15	7.5	0.000234545
	GO:0008286~insulin receptor signaling pathway	7	3.5	0.000237085
	GO:0031644~regulation of neurological system process	12	6	0.000247793
	GO:0000082~G1/S transition of mitotic cell cycle	8	4	0.000263603
	GO:0051054~positive regulation of DNA metabolic process	8	4	0.000263603
	GO:0007507~heart development	14	7	0.00026814
	GO:0010675~regulation of cellular carbohydrate metabolic process	7	3.5	0.000270905
	GO:0051384~response to glucocorticoid stimulus	9	4.5	0.000281961
	GO:0007610~behavior	21	10.5	0.000285791
	GO:0030098~lymphocyte differentiation	10	5	0.000307289
	GO:0006109~regulation of carbohydrate metabolic process	7	3.5	0.000308277
	GO:0009991~response to extracellular stimulus	14	7	0.000328965
	GO:0032989~cellular component morphogenesis	19	9.5	0.000333012
	GO:0007254~JNK cascade	8	4	0.000352757
	GO:0022402~cell cycle process	23	11.5	0.000420306
	GO:0045995~regulation of embryonic development	5	2.5	0.00043136
	GO:0006275~regulation of DNA replication	8	4	0.000481054
	GO:0050767~regulation of neurogenesis	12	6	0.000485614
	GO:0031667~response to nutrient levels	13	6.5	0.000487336
	GO:0031960~response to corticosteroid stimulus	9	4.5	0.000489253
	GO:0007568~aging	10	5	0.000489432
	GO:0031098~stress-activated protein kinase signaling pathway	8	4	0.000518727
	GO:0030879~mammary gland development	8	4	0.000518727
	GO:0032270~positive regulation of cellular protein metabolic process	14	7	0.000560694
	GO:0006171~cAMP biosynthetic process	5	2.5	0.000565727
	GO:0033077~T cell differentiation in the thymus	6	3	0.000568196
	GO:0008542~visual learning	6	3	0.000568196
	GO:0065003~macromolecular complex assembly	25	12.5	0.000569682
	GO:0040008~regulation of growth	17	8.5	0.000590572
	GO:0032844~regulation of homeostatic process	10	5	0.000619994
	GO:0051129~negative regulation of cellular component organization	11	5.5	0.000622655
	GO:0060284~regulation of cell development	13	6.5	0.000674684
	GO:0015674~di-, tri-valent inorganic cation transport	12	6	0.000769391
	GO:0018105~peptidyl-serine phosphorylation	6	3	0.000779636
	GO:0045321~leukocyte activation	14	7	0.000782379
	GO:0051969~regulation of transmission of nerve impulse	11	5.5	0.00081247
	GO:0051240~positive regulation of multicellular organismal process	14	7	0.000835478
	GO:0030258~lipid modification	8	4	0.000867401
	GO:0010605~negative regulation of macromolecule metabolic process	26	13	0.000939609
	GO:0045637~regulation of myeloid cell differentiation	8	4	0.000941653
	GO:0007229~integrin-mediated signaling pathway	8	4	0.000941653
	GO:0007632~visual behavior	6	3	0.00104817
	GO:0033043~regulation of organelle organization	13	6.5	0.00110512
	GO:0034199~activation of protein kinase A activity	5	2.5	0.00118858
	GO:0031175~neuron projection development	14	7	0.00131582
	GO:0009755~hormone-mediated signaling	7	3.5	0.00136532
	GO:0043933~macromolecular complex subunit organization	25	12.5	0.00143414
	GO:0042060~wound healing	12	6	0.0014794
	GO:0010038~response to metal ion	10	5	0.00147944
	GO:0001889~liver development	7	3.5	0.00148961
	GO:0044092~negative regulation of molecular function	16	8	0.00149995
	GO:0003006~reproductive developmental process	14	7	0.00160407
	GO:0051329~interphase of mitotic cell cycle	9	4.5	0.00164654
	GO:0043062~extracellular structure organization	11	5.5	0.00175946
	GO:0010906~regulation of glucose metabolic process	6	3	0.00178443
	GO:0034097~response to cytokine stimulus	8	4	0.00188451
	GO:0032583~regulation of gene-specific transcription	10	5	0.00188913
	GO:0045762~positive regulation of adenylate cyclase activity	7	3.5	0.00194103
	GO:0006357~regulation of transcription from RNA polymerase II promoter	25	12.5	0.0019422
	GO:0051325~interphase	9	4.5	0.0019427
	GO:0030521~androgen receptor signaling pathway	6	3	0.00198769
	GO:0010741~negative regulation of protein kinase cascade	6	3	0.00198769
	GO:0031331~positive regulation of cellular catabolic process	6	3	0.00198769
	GO:0010740~positive regulation of protein kinase cascade	11	5.5	0.00206244
	GO:0034330~cell junction organization	7	3.5	0.0021017
	GO:0050770~regulation of axonogenesis	7	3.5	0.0021017
	GO:0031281~positive regulation of cyclase activity	7	3.5	0.0021017
	GO:0010676~positive regulation of cellular carbohydrate metabolic process	5	2.5	0.00211209
	GO:0045913~positive regulation of carbohydrate metabolic process	5	2.5	0.00211209
	GO:0048584~positive regulation of response to stimulus	13	6.5	0.00218512
	GO:0000187~activation of MAPK activity	8	4	0.00226821
	GO:0051349~positive regulation of lyase activity	7	3.5	0.00249839
	GO:0048169~regulation of long-term neuronal synaptic plasticity	5	2.5	0.00253017
	GO:0043255~regulation of carbohydrate biosynthetic process	5	2.5	0.00253017
	GO:0045429~positive regulation of nitric oxide biosynthetic process	5	2.5	0.00253017
	GO:0007223~Wnt receptor signaling pathway, calcium modulating pathway	5	2.5	0.00253017
	GO:0046058~cAMP metabolic process	5	2.5	0.00253017
	GO:0007612~learning	7	3.5	0.00271656
	GO:0051091~positive regulation of transcription factor activity	7	3.5	0.00271656
	GO:0007179~transforming growth factor beta receptor signaling pathway	7	3.5	0.00271656
	GO:0051259~protein oligomerization	11	5.5	0.00274127
	GO:0044087~regulation of cellular component biogenesis	10	5	0.00274698
	GO:0018209~peptidyl-serine modification	6	3	0.00277946
	GO:0031329~regulation of cellular catabolic process	7	3.5	0.00292152
	GO:0051223~regulation of protein transport	9	4.5	0.0030021
	GO:0010564~regulation of cell cycle process	9	4.5	0.0030021
	GO:0048514~blood vessel morphogenesis	12	6	0.00311266
	GO:0060341~regulation of cellular localization	13	6.5	0.0032682
	GO:0051345~positive regulation of hydrolase activity	11	5.5	0.00336827
	GO:0034329~cell junction assembly	6	3	0.00343654
	GO:0007044~cell-substrate junction assembly	5	2.5	0.00347674
	GO:0001817~regulation of cytokine production	11	5.5	0.00363706
	GO:0030030~cell projection organization	16	8	0.00370258
	GO:0030217~T cell differentiation	7	3.5	0.00397393
	GO:0051098~regulation of binding	10	5	0.00449751
	GO:0007049~cell cycle	25	12.5	0.00449771
	GO:0042306~regulation of protein import into nucleus	6	3	0.00465698
	GO:0009190~cyclic nucleotide biosynthetic process	5	2.5	0.00470403
	GO:0045862~positive regulation of proteolysis	5	2.5	0.00470403
	GO:0010559~regulation of glycoprotein biosynthetic process	4	2	0.00494495
	GO:0048666~neuron development	15	7.5	0.00497432

## Sheet: TN
Category	Term	Count	%	Benjamini		Category	Term	Count	%	Benjamini		Category	Term	Count	%	Benjamini		Category	Term	Count	%	Benjamini
GOTERM_BP_FAT	GO:0010941~regulation of cell death	53	26.7677	1.86371e-17		GOTERM_CC_FAT	GO:0005829~cytosol	50	25.2525	7.40744e-09		GOTERM_MF_FAT	GO:0004672~protein kinase activity	29	14.6465	2.20743e-05		KEGG_PATHWAY	hsa05200:Pathways in cancer	58	29.2929	6.31534e-26
	GO:0043067~regulation of programmed cell death	52	26.2626	4.78309e-17			GO:0005886~plasma membrane	87	43.9394	1.72121e-06			GO:0019899~enzyme binding	26	13.1313	3.28059e-05			hsa04010:MAPK signaling pathway	39	19.697	1.57208e-13
	GO:0042981~regulation of apoptosis	51	25.7576	1.23268e-16			GO:0045121~membrane raft	12	6.06061	0.00034446			GO:0004713~protein tyrosine kinase activity	13	6.56566	0.0007961			hsa05222:Small cell lung cancer	22	11.1111	4.32754e-12
	GO:0012501~programmed cell death	41	20.7071	1.19016e-13			GO:0044459~plasma membrane part	54	27.2727	0.000578803			GO:0019900~kinase binding	13	6.56566	0.00129092			hsa04210:Apoptosis	22	11.1111	6.90403e-12
	GO:0008219~cell death	44	22.2222	2.38032e-13			GO:0005626~insoluble fraction	28	14.1414	0.000828225			GO:0004714~transmembrane receptor protein tyrosine kinase activity	8	4.0404	0.00455688			hsa05218:Melanoma	19	9.59596	1.2864e-10
	GO:0016265~death	44	22.2222	2.38032e-13			GO:0016323~basolateral plasma membrane	13	6.56566	0.000926986			GO:0008083~growth factor activity	11	5.55556	0.00887476			hsa05219:Bladder cancer	15	7.57576	4.61005e-10
	GO:0007242~intracellular signaling cascade	58	29.2929	2.38032e-13			GO:0000267~cell fraction	33	16.6667	0.00101026			GO:0042802~identical protein binding	23	11.6162	0.00947504			hsa05213:Endometrial cancer	16	8.08081	7.82637e-10
	GO:0006915~apoptosis	40	20.202	2.9754e-13			GO:0031982~vesicle	23	11.6162	0.0027493			GO:0004674~protein serine/threonine kinase activity	17	8.58586	0.0235618			hsa05223:Non-small cell lung cancer	15	7.57576	1.50593e-08
	GO:0007167~enzyme linked receptor protein signaling pathway	30	15.1515	1.9571e-12			GO:0031988~membrane-bounded vesicle	21	10.6061	0.00285025			GO:0005524~ATP binding	38	19.1919	0.0239078			hsa04012:ErbB signaling pathway	18	9.09091	2.12087e-08
	GO:0007169~transmembrane receptor protein tyrosine kinase signaling pathway	25	12.6263	2.52309e-12			GO:0045202~synapse	16	8.08081	0.00291059			GO:0008289~lipid binding	17	8.58586	0.0255602			hsa04020:Calcium signaling pathway	25	12.6263	2.15065e-08
	GO:0042127~regulation of cell proliferation	43	21.7172	1.14255e-11			GO:0016023~cytoplasmic membrane-bounded vesicle	20	10.101	0.00371111			GO:0043560~insulin receptor substrate binding	4	2.0202	0.0255845			hsa04310:Wnt signaling pathway	22	11.1111	1.41902e-07
	GO:0043065~positive regulation of apoptosis	32	16.1616	1.36472e-11			GO:0031410~cytoplasmic vesicle	22	11.1111	0.00384398			GO:0001882~nucleoside binding	40	20.202	0.0256911			hsa05215:Prostate cancer	17	8.58586	1.93294e-07
	GO:0043068~positive regulation of programmed cell death	32	16.1616	1.51974e-11			GO:0043256~laminin complex	4	2.0202	0.00424795			GO:0030554~adenyl nucleotide binding	40	20.202	0.0259911			hsa04650:Natural killer cell mediated cytotoxicity	20	10.101	4.00191e-07
	GO:0010942~positive regulation of cell death	32	16.1616	1.59821e-11			GO:0005624~membrane fraction	25	12.6263	0.00439168			GO:0032559~adenyl ribonucleotide binding	38	19.1919	0.026046			hsa05212:Pancreatic cancer	15	7.57576	4.73318e-07
	GO:0007166~cell surface receptor linked signal transduction	67	33.8384	4.38614e-11			GO:0009986~cell surface	15	7.57576	0.00499841			GO:0016563~transcription activator activity	16	8.08081	0.0261016			hsa05220:Chronic myeloid leukemia	15	7.57576	7.6062e-07
	GO:0043549~regulation of kinase activity	28	14.1414	1.58008e-10			GO:0045177~apical part of cell	10	5.05051	0.0126999			GO:0001883~purine nucleoside binding	40	20.202	0.0262326			hsa04660:T cell receptor signaling pathway	17	8.58586	2.42778e-06
	GO:0060548~negative regulation of cell death	28	14.1414	1.81576e-10			GO:0005912~adherens junction	9	4.54545	0.0199987			GO:0008022~protein C-terminus binding	9	4.54545	0.0272243			hsa04510:Focal adhesion	23	11.6162	3.24834e-06
	GO:0051174~regulation of phosphorus metabolic process	32	16.1616	2.23247e-10			GO:0005605~basal lamina	4	2.0202	0.0227434			GO:0043125~ErbB-3 class receptor binding	3	1.51515	0.0307745			hsa04810:Regulation of actin cytoskeleton	23	11.6162	9.82522e-06
	GO:0019220~regulation of phosphate metabolic process	32	16.1616	2.23247e-10			GO:0031264~death-inducing signaling complex	3	1.51515	0.0266033			GO:0019901~protein kinase binding	9	4.54545	0.0317912			hsa04062:Chemokine signaling pathway	21	10.6061	1.45988e-05
	GO:0051338~regulation of transferase activity	28	14.1414	3.51949e-10			GO:0070161~anchoring junction	9	4.54545	0.0326572			GO:0017076~purine nucleotide binding	44	22.2222	0.0429814			hsa04912:GnRH signaling pathway	15	7.57576	1.71806e-05
	GO:0045859~regulation of protein kinase activity	27	13.6364	3.72627e-10			GO:0014069~postsynaptic density	6	3.0303	0.0345816			GO:0005007~fibroblast growth factor receptor activity	3	1.51515	0.0432818			hsa05214:Glioma	12	6.06061	2.71249e-05
	GO:0042325~regulation of phosphorylation	31	15.6566	3.79321e-10			GO:0042995~cell projection	20	10.101	0.0361736			GO:0004709~MAP kinase kinase kinase activity	4	2.0202	0.0474956			hsa04720:Long-term potentiation	12	6.06061	5.58947e-05
	GO:0006917~induction of apoptosis	26	13.1313	4.13505e-10			GO:0005819~spindle	8	4.0404	0.0443461			GO:0019903~protein phosphatase binding	5	2.52525	0.0479456			hsa04270:Vascular smooth muscle contraction	15	7.57576	7.36695e-05
	GO:0012502~induction of programmed cell death	26	13.1313	4.24111e-10			GO:0005606~laminin-1 complex	3	1.51515	0.0449543									hsa04662:B cell receptor signaling pathway	12	6.06061	0.000134095
	GO:0043069~negative regulation of programmed cell death	27	13.6364	7.63705e-10															hsa04520:Adherens junction	12	6.06061	0.000165875
	GO:0043066~negative regulation of apoptosis	26	13.1313	3.30202e-09															hsa04115:p53 signaling pathway	11	5.55556	0.000283376
	GO:0044093~positive regulation of molecular function	33	16.6667	4.16656e-09															hsa05010:Alzheimer's disease	17	8.58586	0.000324272
	GO:0006796~phosphate metabolic process	43	21.7172	4.91769e-09															hsa05211:Renal cell carcinoma	11	5.55556	0.000339219
	GO:0006793~phosphorus metabolic process	43	21.7172	4.91769e-09															hsa04144:Endocytosis	18	9.09091	0.000383884
	GO:0033674~positive regulation of kinase activity	21	10.6061	8.39647e-09															hsa04722:Neurotrophin signaling pathway	14	7.07071	0.000732227
	GO:0010033~response to organic substance	36	18.1818	1.06289e-08															hsa04730:Long-term depression	10	5.05051	0.00141936
	GO:0051347~positive regulation of transferase activity	21	10.6061	1.55045e-08															hsa05221:Acute myeloid leukemia	9	4.54545	0.00199092
	GO:0043085~positive regulation of catalytic activity	30	15.1515	1.92098e-08															hsa04540:Gap junction	11	5.55556	0.00215288
	GO:0006468~protein amino acid phosphorylation	34	17.1717	2.15485e-08															hsa04150:mTOR signaling pathway	8	4.0404	0.00484126
	GO:0045860~positive regulation of protein kinase activity	20	10.101	2.80338e-08															hsa04910:Insulin signaling pathway	13	6.56566	0.00493462
	GO:0007243~protein kinase cascade	25	12.6263	3.51266e-08															hsa05210:Colorectal cancer	10	5.05051	0.00506261
	GO:0008624~induction of apoptosis by extracellular signals	15	7.57576	3.90721e-08															hsa05014:Amyotrophic lateral sclerosis (ALS)	8	4.0404	0.00512475
	GO:0030155~regulation of cell adhesion	16	8.08081	6.03522e-08															hsa04370:VEGF signaling pathway	9	4.54545	0.00917233
	GO:0008284~positive regulation of cell proliferation	26	13.1313	6.0924e-08															hsa04114:Oocyte meiosis	11	5.55556	0.00926813
	GO:0016310~phosphorylation	36	18.1818	1.30382e-07															hsa04664:Fc epsilon RI signaling pathway	9	4.54545	0.0111367
	GO:0010647~positive regulation of cell communication	22	11.1111	5.25331e-07															hsa04930:Type II diabetes mellitus	7	3.53535	0.011556
	GO:0008283~cell proliferation	25	12.6263	7.65906e-07															hsa04630:Jak-STAT signaling pathway	13	6.56566	0.0130362
	GO:0009719~response to endogenous stimulus	23	11.6162	3.96075e-06															hsa04916:Melanogenesis	10	5.05051	0.0134278
	GO:0032147~activation of protein kinase activity	13	6.56566	3.99852e-06															hsa04914:Progesterone-mediated oocyte maturation	9	4.54545	0.0183216
	GO:0051270~regulation of cell motion	16	8.08081	5.44091e-06															hsa04110:Cell cycle	11	5.55556	0.0198672
	GO:0008543~fibroblast growth factor receptor signaling pathway	8	4.0404	6.29093e-06															hsa04070:Phosphatidylinositol signaling system	8	4.0404	0.0256259
	GO:0008633~activation of pro-apoptotic gene products	7	3.53535	2.24326e-05															hsa05414:Dilated cardiomyopathy	9	4.54545	0.0259918
	GO:0010604~positive regulation of macromolecule metabolic process	33	16.6667	2.28182e-05															hsa04666:Fc gamma R-mediated phagocytosis	9	4.54545	0.0293158
	GO:0040012~regulation of locomotion	15	7.57576	2.92105e-05															hsa04530:Tight junction	11	5.55556	0.0296751
	GO:0050678~regulation of epithelial cell proliferation	10	5.05051	3.15215e-05															hsa05216:Thyroid cancer	5	2.52525	0.0328131
	GO:0042592~homeostatic process	30	15.1515	3.87015e-05															hsa04670:Leukocyte transendothelial migration	10	5.05051	0.0342619
	GO:0030334~regulation of cell migration	14	7.07071	3.89005e-05															hsa04620:Toll-like receptor signaling pathway	9	4.54545	0.0388494
	GO:0042692~muscle cell differentiation	12	6.06061	5.13498e-05															hsa04622:RIG-I-like receptor signaling pathway	7	3.53535	0.0618251
	GO:0009725~response to hormone stimulus	20	10.101	5.24863e-05															hsa00562:Inositol phosphate metabolism	6	3.0303	0.0667844
	GO:0031328~positive regulation of cellular biosynthetic process	28	14.1414	6.15149e-05															hsa05412:Arrhythmogenic right ventricular cardiomyopathy (ARVC)	7	3.53535	0.079293
	GO:0009891~positive regulation of biosynthetic process	28	14.1414	7.95282e-05															hsa04060:Cytokine-cytokine receptor interaction	15	7.57576	0.0983435
	GO:0010557~positive regulation of macromolecule biosynthetic process	27	13.6364	8.07969e-05															hsa04512:ECM-receptor interaction	7	3.53535	0.114131
	GO:0031175~neuron projection development	16	8.08081	0.000151894															hsa05120:Epithelial cell signaling in Helicobacter pylori infection	6	3.0303	0.137942
	GO:0008285~negative regulation of cell proliferation	19	9.59596	0.000157016															hsa05016:Huntington's disease	11	5.55556	0.13907
	GO:0009628~response to abiotic stimulus	19	9.59596	0.000201176															hsa04120:Ubiquitin mediated proteolysis	9	4.54545	0.15176
	GO:0051402~neuron apoptosis	6	3.0303	0.000201545															hsa05416:Viral myocarditis	6	3.0303	0.153863
	GO:0045944~positive regulation of transcription from RNA polymerase II promoter	19	9.59596	0.000216279
	GO:0051969~regulation of transmission of nerve impulse	12	6.06061	0.000283585
	GO:0006916~anti-apoptosis	14	7.07071	0.000283658
	GO:0070201~regulation of establishment of protein localization	11	5.55556	0.00030215
	GO:0031644~regulation of neurological system process	12	6.06061	0.000402213
	GO:0010627~regulation of protein kinase cascade	15	7.57576	0.000444421
	GO:0042060~wound healing	13	6.56566	0.000612655
	GO:0016055~Wnt receptor signaling pathway	11	5.55556	0.000653523
	GO:0009967~positive regulation of signal transduction	16	8.08081	0.000683344
	GO:0048732~gland development	11	5.55556	0.000712268
	GO:0050679~positive regulation of epithelial cell proliferation	7	3.53535	0.000719074
	GO:0050804~regulation of synaptic transmission	11	5.55556	0.000748687
	GO:0032880~regulation of protein localization	11	5.55556	0.000837735
	GO:0051223~regulation of protein transport	10	5.05051	0.0010502
	GO:0051146~striated muscle cell differentiation	9	4.54545	0.00105644
	GO:0051173~positive regulation of nitrogen compound metabolic process	24	12.1212	0.00132188
	GO:0051249~regulation of lymphocyte activation	11	5.55556	0.0014452
	GO:0045893~positive regulation of transcription, DNA-dependent	20	10.101	0.00146641
	GO:0045941~positive regulation of transcription	22	11.1111	0.0015352
	GO:0051254~positive regulation of RNA metabolic process	20	10.101	0.00159833
	GO:0000165~MAPKKK cascade	12	6.06061	0.00177747
	GO:0030030~cell projection organization	17	8.58586	0.00201425
	GO:0040017~positive regulation of locomotion	9	4.54545	0.00203857
	GO:0051726~regulation of cell cycle	16	8.08081	0.00209973
	GO:0006970~response to osmotic stress	6	3.0303	0.00210684
	GO:0051050~positive regulation of transport	13	6.56566	0.00213377
	GO:0010628~positive regulation of gene expression	22	11.1111	0.00214967
	GO:0014065~phosphoinositide 3-kinase cascade	4	2.0202	0.00236149
	GO:0048666~neuron development	16	8.08081	0.00257354
	GO:0006357~regulation of transcription from RNA polymerase II promoter	25	12.6263	0.00258687
	GO:0051329~interphase of mitotic cell cycle	9	4.54545	0.00261152
	GO:0055082~cellular chemical homeostasis	17	8.58586	0.0026376
	GO:0032870~cellular response to hormone stimulus	10	5.05051	0.00280926
	GO:0002694~regulation of leukocyte activation	11	5.55556	0.00308519
	GO:0051325~interphase	9	4.54545	0.00309162
	GO:0044057~regulation of system process	15	7.57576	0.00310427
	GO:0000082~G1/S transition of mitotic cell cycle	7	3.53535	0.00312193
	GO:0009314~response to radiation	12	6.06061	0.00314752
	GO:0032268~regulation of cellular protein metabolic process	19	9.59596	0.00332632
	GO:0009416~response to light stimulus	10	5.05051	0.00345781
	GO:0007155~cell adhesion	24	12.1212	0.00346542
	GO:0016337~cell-cell adhesion	14	7.07071	0.00350078
	GO:0022610~biological adhesion	24	12.1212	0.00350351
	GO:0051971~positive regulation of transmission of nerve impulse	6	3.0303	0.00350808
	GO:0001932~regulation of protein amino acid phosphorylation	11	5.55556	0.00383201
	GO:0007611~learning or memory	9	4.54545	0.00384939
	GO:0051240~positive regulation of multicellular organismal process	13	6.56566	0.00400087
	GO:0001568~blood vessel development	13	6.56566	0.00410251
	GO:0050865~regulation of cell activation	11	5.55556	0.0041308
	GO:0046578~regulation of Ras protein signal transduction	12	6.06061	0.00415072
	GO:0031646~positive regulation of neurological system process	6	3.0303	0.00423833
	GO:0007517~muscle organ development	12	6.06061	0.00431134
	GO:0045935~positive regulation of nucleobase, nucleoside, nucleotide and nucleic acid metabolic process	22	11.1111	0.00437996
	GO:0010648~negative regulation of cell communication	13	6.56566	0.00440104
	GO:0010828~positive regulation of glucose transport	5	2.52525	0.00450746
	GO:0046326~positive regulation of glucose import	5	2.52525	0.00450746
	GO:0001775~cell activation	14	7.07071	0.00454787
	GO:0051345~positive regulation of hydrolase activity	11	5.55556	0.0045719
	GO:0001944~vasculature development	13	6.56566	0.00474116
	GO:0007249~I-kappaB kinase/NF-kappaB cascade	7	3.53535	0.00480854
	GO:0051056~regulation of small GTPase mediated signal transduction	13	6.56566	0.00483613
	GO:0050863~regulation of T cell activation	9	4.54545	0.00487073
	GO:0030335~positive regulation of cell migration	8	4.0404	0.00489814
